# Supplementary material for: Contributions of each of the four swimming strokes to elite 200-400 individual medley swimming performance in short and long course competitions
Source: PeerJ. 2023 Dec 15;11:e16612. doi: 10.7717/peerj.16612 (PMC10726738; doi:10.7717/peerj.16612)
Supplement: Supplemental Information 1 — The information is available from World Aquatics (https://www.worldaquatics.com/results?year=2023&month=latest&disciplines=SW). Data collection was conducted for each of the years under study, for each type of event-distance and gender, as well as for each type of competition (Olympic Games and World Championships). This data collection process was exceptionally labor-intensive due to the necessity of extracting data from numerous tables found on the website. [file peerj-11-16612-s001.xlsx]

## Sheet: Hoja1
YEAR	COMPETITION	POOL TYPE	SEX	STROKE	DISTANCE	FINA points	COUNTRY	AGE	TOTAL_TIME	PARTIAL								RANK
										BUTTERFLY	m/s	BACKSTROKE	m/s	BREASTSTROKE	m/s	CRAWL	m/s
2012	JJOO Londres	50	F	IM	200	809	Uzbekistan	18	2:15.37	28.99	1.72473	34.15	1.46413	40.03	1.24906	32.2	1.5528	25
2012	JJOO Londres	50	F	IM	200	811	Sudáfrica	23	2:15.25	29.01	1.72354	34.4	1.45349	39.17	1.27649	32.67	1.53046	24
2012	JJOO Londres	50	F	IM	200	817	Corea del Sur	21	2:14.91	29.24	1.70999	33.88	1.4758	40.15	1.24533	31.64	1.58028	23
2012	JJOO Londres	50	F	IM	200	820	Irlanda	17	2:14.76	28.97	1.72592	35.75	1.3986	37.95	1.31752	32.09	1.55812	22
2012	JJOO Londres	50	F	IM	200	821	Reino Unido	20	2:14.72	28.62	1.74703	34.98	1.42939	38.54	1.29735	32.58	1.53468	21
2012	JJOO Londres	50	F	IM	200	821	Suecia	22	2:14.70	28.6	1.74825	33.51	1.49209	39.99	1.25031	32.6	1.53374	20
2012	JJOO Londres	50	F	IM	200	823	Austria	17	2:14.56	28.89	1.7307	34.19	1.46242	39.68	1.26008	32.2	1.5528	19
2012	JJOO Londres	50	F	IM	200	824	Ucrania	24	2:14.55	29.18	1.7135	36.13	1.38389	38.18	1.30959	31.06	1.60979	18
2012	JJOO Londres	50	F	IM	200	828	Canadá	23	2:14.32	28.83	1.7343	33.65	1.48588	38.85	1.287	33.01	1.51469	17
2012	JJOO Londres	50	F	IM	200	813	España	17	2:15.12	29.11	1.71762	35.41	1.41203	38.63	1.29433	31.97	1.56397	16
2012	JJOO Londres	50	F	IM	200	820	Brasil	25	2:14.74	28.53	1.75254	33.98	1.47145	41.03	1.21862	31.2	1.60256	15
2012	JJOO Londres	50	F	IM	200	825	Japón	22	2:14.47	28.96	1.72652	34.84	1.43513	38.55	1.29702	32.12	1.55666	14
2012	JJOO Londres	50	F	IM	200	847	Israel	22	2:13.31	28.33	1.76491	33.55	1.49031	38.68	1.29266	32.75	1.52672	13
2012	JJOO Londres	50	F	IM	200	848	Alemania	20	2:13.24	28.84	1.7337	34.75	1.43885	38.2	1.3089	31.45	1.58983	12
2012	JJOO Londres	50	F	IM	200	859	China	22	2:12.69	28.47	1.75623	34.38	1.45433	38.83	1.28766	31.01	1.61238	11
2012	JJOO Londres	50	F	IM	200	882	España	21	2:11.54	28.63	1.74642	33.45	1.49477	38.45	1.30039	31.01	1.61238	10
2012	JJOO Londres	50	F	IM	200	882	Hungría	23	2:11.53	28.4	1.76056	33.32	1.5006	39.48	1.26646	30.33	1.64853	9
2012	JJOO Londres	50	F	IM	200	894	Zimbabue	23	2:10.93	29.39	1.70126	32.28	1.54895	38.32	1.3048	30.94	1.61603	8
2012	JJOO Londres	50	F	IM	200	895	Reino Unido	22	2:10.89	29.13	1.71644	32.92	1.51883	37.9	1.31926	30.94	1.61603	7
2012	JJOO Londres	50	F	IM	200	897	Australia	28	2:10.80	28.02	1.78444	32.94	1.51791	38.68	1.29266	31.16	1.60462	6
2012	JJOO Londres	50	F	IM	200	898	Hungría	23	2:10.74	28.26	1.76929	33.48	1.49343	38.68	1.29266	30.32	1.64908	5
2012	JJOO Londres	50	F	IM	200	912	USA	24	2:10.08	28.33	1.76491	33.12	1.50966	37.6	1.32979	31.03	1.61134	4
2012	JJOO Londres	50	F	IM	200	912	USA	21	2:10.06	28.32	1.76554	34.02	1.46972	36.59	1.36649	31.13	1.60617	3
2012	JJOO Londres	50	F	IM	200	917	Australia	24	2:09.83	27.8	1.79856	33.14	1.50875	38.18	1.30959	30.71	1.62813	2
2012	JJOO Londres	50	F	IM	200	948	China	16	2:08.39	28	1.78571	32.42	1.54226	37.38	1.33761	30.59	1.63452	1
2012	JJOO Londres	50	F	IM	400	813	Venezuela	20	4:48.64	63.4	0.788644	73.42	0.681013	87.53	0.571233	64.89	0.770535	27
2012	JJOO Londres	50	F	IM	400	817	Ucrania	24	4:48.19	66.04	0.757117	76.72	0.651721	79.64	0.627825	66.79	0.748615	26
2012	JJOO Londres	50	F	IM	400	829	España	17	4:46.80	63.14	0.791891	73.39	0.681292	83.98	0.59538	66.29	0.754262	25
2012	JJOO Londres	50	F	IM	400	836	Rusia	24	4:45.94	63.23	0.790764	72.55	0.68918	83.32	0.600096	66.84	0.748055	24
2012	JJOO Londres	50	F	IM	400	838	Austria	29	4:45.80	64.6	0.773994	71.95	0.694927	83.49	0.598874	65.76	0.760341	23
2012	JJOO Londres	50	F	IM	400	839	Italia	18	4:45.61	63.13	0.792016	71.63	0.698032	85.03	0.588028	65.82	0.759648	22
2012	JJOO Londres	50	F	IM	400	840	Canadá	23	4:45.49	62.77	0.796559	72.53	0.68937	83.57	0.598301	66.62	0.750525	21
2012	JJOO Londres	50	F	IM	400	844	Japón	19	4:45.10	65.05	0.76864	72.71	0.687663	78.89	0.633794	68.55	0.729395	20
2012	JJOO Londres	50	F	IM	400	847	Nueva Zelanda	22	4:44.78	63.47	0.787774	70.91	0.705119	83.81	0.596588	66.57	0.751089	19
2012	JJOO Londres	50	F	IM	400	851	Francia	20	4:44.28	62.68	0.797703	73.32	0.681942	81.45	0.613874	66.33	0.753807	18
2012	JJOO Londres	50	F	IM	400	854	Corea del Sur	18	4:43.99	63.13	0.792016	72.71	0.687663	81.27	0.615233	66.88	0.747608	17
2012	JJOO Londres	50	F	IM	400	858	Sudáfrica	23	4:43.46	63.3	0.789889	73.17	0.68334	80.86	0.618353	66.13	0.756086	16
2012	JJOO Londres	50	F	IM	400	873	República Checa	19	4:41.84	63.35	0.789266	70.65	0.707714	82.98	0.602555	64.86	0.770891	15
2012	JJOO Londres	50	F	IM	400	875	Suecia	22	4:41.66	63.64	0.785669	71.31	0.701164	81.74	0.611696	64.97	0.769586	14
2012	JJOO Londres	50	F	IM	400	887	Australia	21	4:40.42	64.2	0.778816	71.06	0.703631	82.67	0.604814	62.49	0.800128	13
2012	JJOO Londres	50	F	IM	400	899	Japón	18	4:39.13	63	0.793651	70.21	0.712149	79.53	0.628694	66.39	0.753125	12
2012	JJOO Londres	50	F	IM	400	902	Reino Unido	19	4:38.87	63.28	0.790139	69.47	0.719735	80.9	0.618047	65.22	0.766636	11
2012	JJOO Londres	50	F	IM	400	908	Eslovenia	24	4:38.20	63.33	0.789515	71.76	0.696767	79.75	0.626959	63.34	0.789391	10
2012	JJOO Londres	50	F	IM	400	916	Hungría	23	4:37.37	62.08	0.805412	69.48	0.719632	80.46	0.621427	65.35	0.765111	9
2012	JJOO Londres	50	F	IM	400	934	España	21	4:35.62	61.64	0.811162	71.79	0.696476	79.28	0.630676	62.91	0.794786	8
2012	JJOO Londres	50	F	IM	400	935	USA	21	4:35.49	61.87	0.808146	72.59	0.6888	76.54	0.653253	64.45	0.775795	7
2012	JJOO Londres	50	F	IM	400	935	Australia	24	4:35.49	61.6	0.811688	70.21	0.712149	79.7	0.627353	63.98	0.781494	6
2012	JJOO Londres	50	F	IM	400	949	Reino Unido	22	4:34.17	63.02	0.793399	69.92	0.715103	78.26	0.638896	62.87	0.795292	5
2012	JJOO Londres	50	F	IM	400	956	Hungria	23	4:33.49	61.34	0.815129	69.66	0.717772	77.7	0.643501	62.66	0.797957	4
2012	JJOO Londres	50	F	IM	400	962	China	18	4:32.91	62.91	0.794786	69	0.724638	79.42	0.629564	61.58	0.811952	3
2012	JJOO Londres	50	F	IM	400	980	USA	19	4:31.27	63.1	0.792393	68.18	0.733353	77.66	0.643832	62.33	0.802182	2
2012	JJOO Londres	50	F	IM	400	1011	China	16	4:28.43	62.19	0.803988	69.54	0.719011	78.02	0.640861	58.68	0.852079	1
2012	JJOO Londres	50	M	IM	200	825	Australia	18	2:01.54	25.36	1.97161	31.19	1.60308	35.16	1.42207	29.83	1.67616	31
2012	JJOO Londres	50	M	IM	200	827	China	25	2:01.43	25.62	1.9516	30.69	1.6292	35.99	1.38927	29.13	1.71644	30
2012	JJOO Londres	50	M	IM	200	827	Túnez	23	2:01.41	25.89	1.93125	31.05	1.61031	35.17	1.42167	29.3	1.70648	29
2012	JJOO Londres	50	M	IM	200	829	Suiza	24	2:01.35	26.33	1.89897	31.69	1.57778	34.25	1.45985	29.08	1.71939	28
2012	JJOO Londres	50	M	IM	200	829	Alemania	21	2:01.32	25.21	1.98334	32.09	1.55812	36.33	1.37627	27.69	1.80571	27
2012	JJOO Londres	50	M	IM	200	831	Grecia	18	2:01.23	26.4	1.89394	30.41	1.6442	35.43	1.41123	29.01	1.72354	26
2012	JJOO Londres	50	M	IM	200	834	Estonia	24	02:01:09	26	1.92308	31.32	1.59642	34.26	1.45943	29.61	1.68862	25
2012	JJOO Londres	50	M	IM	200	836	Rusia	24	2:01.00	26.28	1.90259	30.12	1.66003	35.63	1.40331	28.97	1.72592	24
2012	JJOO Londres	50	M	IM	200	839	China	18	2:00.85	25.66	1.94856	31.2	1.60256	35.48	1.40924	28.51	1.75377	23
2012	JJOO Londres	50	M	IM	200	839	Barbados	25	2:00.85	26.08	1.91718	30.59	1.63452	34.96	1.43021	29.22	1.71116	22
2012	JJOO Londres	50	M	IM	200	843	Sudáfrica	27	2:00.67	25.64	1.95008	30.85	1.62075	35.8	1.39665	28.38	1.7618	21
2012	JJOO Londres	50	M	IM	200	844	Italia	25	2:00.63	25.89	1.93125	30.12	1.66003	35.28	1.41723	29.36	1.703	20
2012	JJOO Londres	50	M	IM	200	847	Polonia	20	2:00.45	25.53	1.95848	30.23	1.65399	35.35	1.41443	29.34	1.70416	19
2012	JJOO Londres	50	M	IM	200	848	Portugal	24	2:00.40	25.84	1.93498	31.05	1.61031	34.37	1.45476	29.14	1.71585	18
2012	JJOO Londres	50	M	IM	200	849	Luxemburgo	20	2:00.38	25.73	1.94326	30.47	1.64096	35.19	1.42086	28.99	1.72473	17
2012	JJOO Londres	50	M	IM	200	886	Austria	30	1:58.66	25.93	1.92827	29.66	1.68577	34.33	1.45645	28.64	1.74581	16
2012	JJOO Londres	50	M	IM	200	824	Canadá	23	2:01.58	26.05	1.91939	30.27	1.6518	35.43	1.41123	29.83	1.67616	15
2012	JJOO Londres	50	M	IM	200	847	Australia	20	2:00.46	25.48	1.96232	31.13	1.60617	34.38	1.45433	29.47	1.69664	14
2012	JJOO Londres	50	M	IM	200	854	Lituania	30	2:00.13	25.79	1.93874	30.57	1.63559	34.82	1.43596	28.95	1.72712	13
2012	JJOO Londres	50	M	IM	200	866	Brasil	21	1:59.58	25.34	1.97316	29.5	1.69492	35.16	1.42207	29.58	1.69033	12
2012	JJOO Londres	50	M	IM	200	866	Reino Unido	27	1:59.57	25.49	1.96155	30.99	1.61342	34.54	1.4476	28.55	1.75131	11
2012	JJOO Londres	50	M	IM	200	875	Israel	25	1:59.17	26.1	1.91571	30.74	1.62655	33.53	1.4912	28.4	1.76056	10
2012	JJOO Londres	50	M	IM	200	881	Alemania	22	1:58.88	25.38	1.97006	30.21	1.65508	34.09	1.46671	29.16	1.71468	9
2012	JJOO Londres	50	M	IM	200	876	Alemania	22	1:59.10	25.03	1.9976	30.9	1.61812	33.62	1.48721	28.55	1.75131	8
2012	JJOO Londres	50	M	IM	200	878	Reino Unido	29	1:59.05	25.16	1.98728	29.07	1.71999	34.8	1.43678	30.02	1.66556	7
2012	JJOO Londres	50	M	IM	200	889	Japón	27	1:58.53	25.49	1.96155	29.84	1.6756	34.47	1.45054	28.73	1.74034	6
2012	JJOO Londres	50	M	IM	200	916	Japón	17	1:57.35	25.83	1.93573	29.13	1.71644	34.32	1.45688	28.07	1.78126	5
2012	JJOO Londres	50	M	IM	200	931	Brasil	26	1:56.74	25.2	1.98413	28.39	1.76118	33.7	1.48368	29.45	1.69779	4
2012	JJOO Londres	50	M	IM	200	943	Hungria	26	1:56.22	25.03	1.9976	29.82	1.67673	33.11	1.51012	28.26	1.76929	3
2012	JJOO Londres	50	M	IM	200	976	USA	27	1:54.90	24.79	2.01694	29.1	1.71821	33.48	1.49343	27.53	1.8162	2
2012	JJOO Londres	50	M	IM	200	992	USA	27	1:54.27	24.63	2.03004	28.63	1.74642	33.33	1.50015	27.68	1.80636	1
2012	JJOO Londres	50	M	IM	400	812	Barbados	25	4:21.32	57.85	0.864304	66.66	0.750075	74.18	0.674036	62.63	0.798339	25
2012	JJOO Londres	50	M	IM	400	822	Reino Unido	27	4:20.24	56.89	0.878889	67.64	0.739208	73.59	0.67944	62.12	0.804894	24
2012	JJOO Londres	50	M	IM	400	832	Canadá	18	4:19.17	57.75	0.865801	66.76	0.748951	74.07	0.675037	60.59	0.825219	23
2012	JJOO Londres	50	M	IM	400	841	Hungria	23	4:18.31	58.47	0.855139	65.6	0.762195	72.8	0.686813	61.44	0.813802	22
2012	JJOO Londres	50	M	IM	400	843	Rusia	24	4:18.12	58.36	0.856751	66.42	0.752785	72.92	0.685683	60.42	0.827541	21
2012	JJOO Londres	50	M	IM	400	851	Italia	25	4:17.22	58.04	0.861475	63.82	0.783453	73.92	0.676407	61.44	0.813802	20
2012	JJOO Londres	50	M	IM	400	851	Sudáfrica	22	4:17.22	58.87	0.849329	63.66	0.785423	74.17	0.674127	60.52	0.826173	19
2012	JJOO Londres	50	M	IM	400	852	Luxemburgo	20	4:17.20	57.22	0.87382	67.15	0.744602	72.63	0.688421	60.2	0.830565	18
2012	JJOO Londres	50	M	IM	400	853	Grecia	28	4:17.04	56.97	0.877655	66.28	0.754375	73.49	0.680365	60.3	0.829187	17
2012	JJOO Londres	50	M	IM	400	857	Bélgica	19	4:16.71	58.81	0.850196	63.2	0.791139	74.9	0.667557	59.8	0.83612	16
2012	JJOO Londres	50	M	IM	400	857	Ucrania	18	4:16.63	58.92	0.848608	63.82	0.783453	71.97	0.694734	58.92	0.848608	15
2012	JJOO Londres	50	M	IM	400	868	China	20	4:15.57	57.64	0.867453	64.1	0.780031	74.48	0.671321	59.35	0.84246	14
2012	JJOO Londres	50	M	IM	400	868	Reino Unido	21	4:15.56	57.56	0.868659	65.7	0.761035	73.12	0.683807	59.18	0.84488	13
2012	JJOO Londres	50	M	IM	400	869	China	20	4:15.45	58.19	0.859254	65.72	0.760803	71.16	0.702642	60.38	0.828089	12
2012	JJOO Londres	50	M	IM	400	870	Alemania	23	4:15.41	57.03	0.876732	63.9	0.782473	74.97	0.666933	59.51	0.840195	11
2012	JJOO Londres	50	M	IM	400	876	Israel	25	4:14.77	57.68	0.866852	65.31	0.76558	71.66	0.697739	60.12	0.83167	10
2012	JJOO Londres	50	M	IM	400	891	Hungría	26	4:13.40	55.99	0.893017	63.42	0.788395	72.55	0.68918	61.44	0.813802	9
2012	JJOO Londres	50	M	IM	400	875	Italia	26	4:14.89	58.92	0.848608	63.15	0.791766	72.7	0.687758	60.12	0.83167	8
2012	JJOO Londres	50	M	IM	400	890	Australia	20	4:13.49	56.75	0.881057	65.25	0.766284	73.36	0.68157	58.13	0.860141	7
2012	JJOO Londres	50	M	IM	400	892	Japón	21	4:13.30	57.68	0.866852	64.67	0.773156	73.37	0.681477	57.58	0.868357	6
2012	JJOO Londres	50	M	IM	400	901	Sudáfrica	20	4:12.92	55.48	0.901226	64.84	0.771129	72.95	0.685401	59.15	0.845309	5
2012	JJOO Londres	50	M	IM	400	935	USA	27	4:09.28	55.35	0.903342	64.06	0.780518	71.56	0.698714	58.32	0.857339	4
2012	JJOO Londres	50	M	IM	400	939	Japón	17	4:08.94	56.77	0.880747	62.41	0.801154	71.56	0.698714	58.2	0.859107	3
2012	JJOO Londres	50	M	IM	400	940	Brasil	26	4:08.86	56.76	0.880902	63.85	0.783085	68.55	0.729395	59.7	0.837521	2
2012	JJOO Londres	50	M	IM	400	983	USA	27	4:05.18	55.02	0.90876	61.84	0.808538	69.67	0.717669	58.65	0.852515	1
2012	Cpto M Turquía	25	F	IM	200	803	República Checa	19	2:14.03	28.82	1.73491	33.01	1.51469	39.74	1.25818	32.46	1.54036	24
2012	Cpto M Turquía	25	F	IM	200	803	Uzbekistan	18	2:14.01	29.59	1.68976	33.1	1.51057	39.66	1.26072	31.66	1.57928	23
2012	Cpto M Turquía	25	F	IM	200	804	Sudáfrica	21	2:13.95	30.04	1.66445	33.4	1.49701	39.11	1.27845	31.4	1.59236	22
2012	Cpto M Turquía	25	F	IM	200	806	Austria	29	2:13.84	29.09	1.7188	33.08	1.51149	40.53	1.23365	31.14	1.60565	21
2012	Cpto M Turquía	25	F	IM	200	830	Dinamarca	20	2:12.54	28.41	1.75994	34.24	1.46028	38.46	1.30005	31.43	1.59084	20
2012	Cpto M Turquía	25	F	IM	200	836	Italia	18	2:12.24	28.14	1.77683	33.39	1.49745	39.82	1.25565	30.89	1.61865	19
2012	Cpto M Turquía	25	F	IM	200	838	Japón	15	2:12.14	28.6	1.74825	32.79	1.52486	40.08	1.2475	30.67	1.63026	18
2012	Cpto M Turquía	25	F	IM	200	842	Italia	18	2:11.91	28.33	1.76491	32.79	1.52486	39.93	1.25219	30.86	1.62022	17
2012	Cpto M Turquía	25	F	IM	200	845	China	17	2:11.75	29	1.72414	34.08	1.46714	38.11	1.31199	30.56	1.63613	16
2012	Cpto M Turquía	25	F	IM	200	846	Holanda	24	2:11.74	28.39	1.76118	32.44	1.54131	39.64	1.26135	31.27	1.59898	15
2012	Cpto M Turquía	25	F	IM	200	848	Rusia	26	2:11.63	29.01	1.72354	32.97	1.51653	38.98	1.28271	30.67	1.63026	14
2012	Cpto M Turquía	25	F	IM	200	848	Alemania	20	2:11.59	28.04	1.78317	33.96	1.47232	37.8	1.32275	31.79	1.57282	13
2012	Cpto M Turquía	25	F	IM	200	852	Polonia	20	2:11.39	28.8	1.73611	33.01	1.51469	38.77	1.28966	30.81	1.62285	12
2012	Cpto M Turquía	25	F	IM	200	857	Corea del Sur	21	2:11.16	28.41	1.75994	32.67	1.53046	38.64	1.294	31.44	1.59033	11
2012	Cpto M Turquía	25	F	IM	200	866	Australia	20	2:10.68	28.75	1.73913	32.95	1.51745	38.22	1.30822	30.76	1.62549	10
2012	Cpto M Turquía	25	F	IM	200	869	Japón	20	2:10.53	29.57	1.6909	33.41	1.49656	36.16	1.38274	31.39	1.59286	9
2012	Cpto M Turquía	25	F	IM	200	847	Ucrania	25	2:11.66	29.14	1.71585	33.7	1.48368	37.99	1.31614	30.83	1.6218	8
2012	Cpto M Turquía	25	F	IM	200	897	Reino Unido	20	2:09.16	28.29	1.76741	32.46	1.54036	36.87	1.35612	31.54	1.58529	7
2012	Cpto M Turquía	25	F	IM	200	908	USA	20	2:08.63	28.87	1.7319	33.5	1.49254	36.4	1.37363	29.86	1.67448	6
2012	Cpto M Turquía	25	F	IM	200	927	USA	19	2:07.77	28.11	1.77873	31.36	1.59439	37.94	1.31787	30.36	1.6469	5
2012	Cpto M Turquía	25	F	IM	200	936	Hungría	23	2:07.36	27.68	1.80636	31.85	1.56986	37.3	1.34048	30.53	1.63773	4
2012	Cpto M Turquía	25	F	IM	200	941	Reino Unido	23	2:07.12	28.75	1.73913	31.92	1.56642	36.54	1.36836	29.91	1.67168	3
2012	Cpto M Turquía	25	F	IM	200	997	Hungría	23	2:04.72	27.79	1.79921	31.63	1.58078	36.5	1.36986	28.8	1.73611	2
2012	Cpto M Turquía	25	F	IM	200	999	China	16	2:04.64	27.95	1.78891	31.57	1.58378	36.63	1.365	28.49	1.755	1
2012	Cpto M Turquía	25	F	IM	400	806	Sudáfrica	20	4:40.45	63.43	0.788271	70.08	0.71347	82.94	0.602845	64	0.78125	16
2012	Cpto M Turquía	25	F	IM	400	808	Holanda	24	4:40.19	63.3	0.789889	69.99	0.714388	81.97	0.609979	64.93	0.77006	15
2012	Cpto M Turquía	25	F	IM	400	808	Rusia	17	4:40.19	65.5	0.763359	70.86	0.705617	79.86	0.626096	63.97	0.781616	14
2012	Cpto M Turquía	25	F	IM	400	809	Italia	18	4:40.04	63.19	0.791264	69.8	0.716332	82.72	0.604449	64.33	0.777242	13
2012	Cpto M Turquía	25	F	IM	400	819	China	17	4:38.93	63.32	0.78964	70.06	0.713674	79.99	0.625078	65.56	0.76266	12
2012	Cpto M Turquía	25	F	IM	400	829	Australia	20	4:37.84	62.72	0.797194	69.35	0.720981	80.5	0.621118	65.27	0.766049	11
2012	Cpto M Turquía	25	F	IM	400	830	Sudáfrica	21	4:37.66	64.52	0.774954	69.83	0.716025	78.37	0.637999	64.94	0.769941	10
2012	Cpto M Turquía	25	F	IM	400	858	USA	15	4:34.70	63.04	0.793147	68.45	0.73046	81.01	0.617208	62.2	0.803859	9
2012	Cpto M Turquía	25	F	IM	400	834	República Checa	19	4:37.30	62.92	0.79466	68.94	0.725268	81.25	0.615385	64.19	0.778938	8
2012	Cpto M Turquía	25	F	IM	400	849	Japón	15	4:35.59	64.11	0.77991	69.24	0.722126	80.68	0.619732	61.56	0.812216	7
2012	Cpto M Turquía	25	F	IM	400	888	Japón	20	4:31.55	64.05	0.78064	69.16	0.722961	74.06	0.675128	64.29	0.777726	6
2012	Cpto M Turquía	25	F	IM	400	918	USA	19	4:28.55	62.22	0.8036	66.83	0.748167	77.73	0.643252	61.77	0.809454	5
2012	Cpto M Turquía	25	F	IM	400	934	Hungría	23	4:26.99	61.55	0.812348	66.86	0.747831	77.99	0.641108	60.59	0.825219	4
2012	Cpto M Turquía	25	F	IM	400	945	Hungría	23	4:25.95	61.66	0.810898	69.73	0.717051	76.97	0.649604	59.59	0.839067	3
2012	Cpto M Turquía	25	F	IM	400	974	China	16	4:23.33	63.21	0.791014	67.34	0.742501	74.75	0.668896	58.03	0.861623	2
2012	Cpto M Turquía	25	F	IM	400	976	Reino Unido	23	4:23.14	62.6	0.798722	66.88	0.747608	73.78	0.67769	59.88	0.835003	1
2012	Cpto M Turquía	25	M	IM	200	802	Canadá	24	1:58.45	25.76	1.94099	30.04	1.66445	34.08	1.46714	28.57	1.75009	24
2012	Cpto M Turquía	25	M	IM	200	803	Bielorrusia	21	1:58.43	25.85	1.93424	30.24	1.65344	33.92	1.47406	28.42	1.75932	23
2012	Cpto M Turquía	25	M	IM	200	804	Polonia	18	1:58.38	25.25	1.9802	29.52	1.69377	35.43	1.41123	28.18	1.77431	22
2012	Cpto M Turquía	25	M	IM	200	804	Reino Unido	21	1:58.36	25.73	1.94326	30.27	1.6518	34.04	1.46886	28.32	1.76554	21
2012	Cpto M Turquía	25	M	IM	200	806	Rusia	22	1:58.24	25.32	1.97472	30.2	1.65563	33.81	1.47885	28.91	1.72951	20
2012	Cpto M Turquía	25	M	IM	200	807	Bielorrusia	22	1:58.21	25.58	1.95465	29.48	1.69607	34.35	1.4556	28.8	1.73611	19
2012	Cpto M Turquía	25	M	IM	200	810	Suiza	23	1:58.09	26.07	1.91791	28.91	1.72951	34.59	1.4455	28.52	1.75316	18
2012	Cpto M Turquía	25	M	IM	200	810	Dinamarca	19	1:58.07	25.81	1.93723	29.84	1.6756	34.21	1.46156	28.21	1.77242	17
2012	Cpto M Turquía	25	M	IM	200	812	Austria	20	1:57.98	25.49	1.96155	29.59	1.68976	33.35	1.49925	29.55	1.69205	16
2012	Cpto M Turquía	25	M	IM	200	813	Grecia	18	1:57.90	25.4	1.9685	29.42	1.69952	34.31	1.4573	28.77	1.73792	15
2012	Cpto M Turquía	25	M	IM	200	822	Uzbekistan	20	1:57.51	25.24	1.98098	29.62	1.68805	34.25	1.45985	28.4	1.76056	14
2012	Cpto M Turquía	25	M	IM	200	840	China	26	1:56.64	25.48	1.96232	29.53	1.69319	34.09	1.46671	27.54	1.81554	13
2012	Cpto M Turquía	25	M	IM	200	849	Hungria	24	1:56.22	25.27	1.97863	29.41	1.7001	32.94	1.51791	28.6	1.74825	12
2012	Cpto M Turquía	25	M	IM	200	851	Polonia	18	1:56.16	25.56	1.95618	29.62	1.68805	33.45	1.49477	27.53	1.8162	11
2012	Cpto M Turquía	25	M	IM	200	855	Australia	22	1:55.98	25.49	1.96155	28.18	1.77431	34.1	1.46628	28.21	1.77242	10
2012	Cpto M Turquía	25	M	IM	200	860	Israel	25	1:55.72	25.06	1.99521	28.9	1.7301	33	1.51515	28.76	1.73853	9
2012	Cpto M Turquía	25	M	IM	200	847	Suecia	26	1:56.31	25.05	1.99601	28.59	1.74886	33.91	1.47449	28.76	1.73853	8
2012	Cpto M Turquía	25	M	IM	200	862	Portugal	24	1:55.63	25.25	1.9802	28.49	1.755	33.59	1.48854	28.3	1.76678	7
2012	Cpto M Turquía	25	M	IM	200	898	Japón	18	1:54.08	25.2	1.98413	27.66	1.80766	33.49	1.49298	27.73	1.8031	6
2012	Cpto M Turquía	25	M	IM	200	900	USA	23	1:53.99	24.85	2.01207	28.68	1.74338	32.47	1.53988	27.99	1.78635	5
2012	Cpto M Turquía	25	M	IM	200	914	Australia	20	1:53.42	24.25	2.06186	28.49	1.755	33.09	1.51103	27.59	1.81225	4
2012	Cpto M Turquía	25	M	IM	200	927	Hungría	27	1:52.89	24.31	2.05677	27.74	1.80245	33.09	1.51103	27.75	1.8018	3
2012	Cpto M Turquía	25	M	IM	200	929	Japón	18	1:52.80	24.5	2.04082	28.58	1.74948	32.17	1.55424	27.55	1.81488	2
2012	Cpto M Turquía	25	M	IM	200	1012	USA	28	1:49.63	23.71	2.10881	27.03	1.8498	31.74	1.5753	27.15	1.84162	1
2012	Cpto M Turquía	25	M	IM	400	809	Dinamarca	19	4:12.70	56.99	0.877347	62.71	0.797321	74.71	0.669254	58.29	0.85778	17
2012	Cpto M Turquía	25	M	IM	400	812	Bielorrusia	21	4:12.36	57.84	0.864454	64.34	0.777122	70.85	0.705716	59.43	0.841326	16
2012	Cpto M Turquía	25	M	IM	400	820	Polonia	18	4:11.60	57.57	0.868508	63.91	0.78235	72.34	0.691181	57.78	0.865351	15
2012	Cpto M Turquía	25	M	IM	400	824	Reino Unido	21	4:11.17	58.02	0.861772	62.84	0.795672	71.63	0.698032	58.68	0.852079	14
2012	Cpto M Turquía	25	M	IM	400	825	Sudáfrica	20	4:11.08	57.71	0.866401	63.67	0.785299	71.08	0.703433	58.62	0.852951	13
2012	Cpto M Turquía	25	M	IM	400	832	USA	19	4:10.38	55.99	0.893017	60.71	0.823588	73.25	0.682594	60.43	0.827404	12
2012	Cpto M Turquía	25	M	IM	400	834	Austria	20	4:10.18	57.27	0.873057	63.55	0.786782	69.54	0.719011	59.83	0.835701	11
2012	Cpto M Turquía	25	M	IM	400	838	China	26	4:09.76	57.27	0.873057	65.57	0.762544	70.3	0.711238	56.62	0.88308	10
2012	Cpto M Turquía	25	M	IM	400	840	Australia	22	4:09.59	57.78	0.865351	61.15	0.817661	72.04	0.694059	58.62	0.852951	9
2012	Cpto M Turquía	25	M	IM	400	836	Portugal	24	4:09.95	56.83	0.879817	63.88	0.782718	69.93	0.715001	59.31	0.843028	8
2012	Cpto M Turquía	25	M	IM	400	859	USA	21	4:07.67	56.95	0.877963	62.54	0.799488	70.05	0.713776	58.13	0.860141	7
2012	Cpto M Turquía	25	M	IM	400	868	Dinamarca	24	4:06.81	57.03	0.876732	63.28	0.790139	68.11	0.734107	58.39	0.856311	6
2012	Cpto M Turquía	25	M	IM	400	895	Israel	25	4:04.29	56.48	0.885269	63.52	0.787154	67.31	0.742832	56.98	0.877501	5
2012	Cpto M Turquía	25	M	IM	400	897	Japón	18	4:04.13	56.37	0.886997	59.23	0.844167	70.3	0.711238	58.33	0.857192	4
2012	Cpto M Turquía	25	M	IM	400	911	Hungría	24	4:02.87	56.89	0.878889	61.02	0.819403	67.57	0.739973	57.39	0.871232	3
2012	Cpto M Turquía	25	M	IM	400	938	Hungría	27	4:00.50	55.76	0.8967	59.54	0.839772	68.6	0.728863	56.6	0.883392	2
2012	Cpto M Turquía	25	M	IM	400	954	Japón	18	3:59.15	55.07	0.907935	60.71	0.823588	66.69	0.749738	56.68	0.882145	1
2013	Cpto M Barcelona	50	F	IM	200	814	Canadá	23	2:15.08	29.88	1.67336	34.86	1.43431	39.81	1.25597	30.53	1.63773	27
2013	Cpto M Barcelona	50	F	IM	200	815	Brasil	26	2:15.00	29.58	1.69033	33.92	1.47406	40.92	1.2219	30.58	1.63506	26
2013	Cpto M Barcelona	50	F	IM	200	816	República Checa	20	2:14.98	29.51	1.69434	34.35	1.4556	40.08	1.2475	31.04	1.61082	25
2013	Cpto M Barcelona	50	F	IM	200	816	Italia	19	2:14.98	28.55	1.75131	34.73	1.43968	40.13	1.24595	31.57	1.58378	24
2013	Cpto M Barcelona	50	F	IM	200	817	México	21	2:14.93	29.8	1.67785	35.43	1.41123	37.99	1.31614	31.71	1.57679	23
2013	Cpto M Barcelona	50	F	IM	200	817	Alemania	18	2:14.90	28.16	1.77557	34.21	1.46156	40.28	1.24131	32.25	1.55039	22
2013	Cpto M Barcelona	50	F	IM	200	818	Austria	18	2:14.85	29.08	1.71939	34.16	1.4637	40.1	1.24688	31.51	1.5868	21
2013	Cpto M Barcelona	50	F	IM	200	820	Alemania	21	2:14.73	28.59	1.74886	34.31	1.4573	39.72	1.25881	32.11	1.55715	20
2013	Cpto M Barcelona	50	F	IM	200	823	Francia	27	2:14.57	28.39	1.76118	36.11	1.38466	37.67	1.32732	32.4	1.54321	19
2013	Cpto M Barcelona	50	F	IM	200	827	Irlanda	18	2:14.38	29.05	1.72117	35.55	1.40647	38.53	1.29769	31.25	1.6	18
2013	Cpto M Barcelona	50	F	IM	200	833	Suecia	23	2:14.02	28.27	1.76866	34.14	1.46456	38.7	1.29199	32.91	1.5193	17
2013	Cpto M Barcelona	50	F	IM	200	837	Canadá	18	2:13.84	30.08	1.66223	34.21	1.46156	38.15	1.31062	31.4	1.59236	16
2013	Cpto M Barcelona	50	F	IM	200	813	España	18	2:15.11	29.52	1.69377	34.36	1.45518	39.81	1.25597	31.42	1.59134	15
2013	Cpto M Barcelona	50	F	IM	200	833	Japón	18	2:14.02	29.31	1.7059	34.57	1.44634	38.43	1.30107	31.71	1.57679	14
2013	Cpto M Barcelona	50	F	IM	200	859	Rusia	21	2:12.67	27.91	1.79147	33.95	1.47275	39.21	1.27518	31.6	1.58228	13
2013	Cpto M Barcelona	50	F	IM	200	879	USA	20	2:11.69	28.88	1.7313	32.86	1.52161	38.85	1.287	31.1	1.60772	12
2013	Cpto M Barcelona	50	F	IM	200	882	Japón	16	2:11.50	29.12	1.71703	35.05	1.42653	36.42	1.37287	30.91	1.6176	11
2013	Cpto M Barcelona	50	F	IM	200	886	China	16	2:11.34	28.15	1.7762	33.48	1.49343	38.48	1.29938	31.23	1.60102	10
2013	Cpto M Barcelona	50	F	IM	200	886	Reino Unido	17	2:11.33	27.49	1.81884	33.38	1.4979	38.38	1.30276	32.08	1.5586	9
2013	Cpto M Barcelona	50	F	IM	200	872	Reino Unido	17	2:12.03	27.65	1.80832	32.55	1.5361	39.49	1.26614	32.34	1.54607	8
2013	Cpto M Barcelona	50	F	IM	200	886	Reino Unido	21	2:11.32	28.55	1.75131	34.25	1.45985	36.47	1.37099	32.05	1.56006	7
2013	Cpto M Barcelona	50	F	IM	200	894	Hungria	24	2:10.95	28.43	1.75871	32.92	1.51883	37.49	1.33369	32.11	1.55715	6
2013	Cpto M Barcelona	50	F	IM	200	898	USA	22	2:10.73	28.19	1.77368	33.17	1.50739	37.81	1.3224	31.56	1.58428	5
2013	Cpto M Barcelona	50	F	IM	200	903	China	17	2:10.48	28.03	1.7838	32.99	1.51561	38.96	1.28337	30.5	1.63934	4
2013	Cpto M Barcelona	50	F	IM	200	925	España	22	2:09.45	28	1.78571	33.94	1.47319	37.08	1.34844	30.43	1.64312	3
2013	Cpto M Barcelona	50	F	IM	200	926	Australia	25	2:09.39	27.77	1.8005	32.8	1.52439	37.78	1.32345	31.04	1.61082	2
2013	Cpto M Barcelona	50	F	IM	200	959	Hungria	24	2:07.92	27.2	1.83824	32.19	1.55328	37.46	1.33476	31.07	1.60927	1
2013	Cpto M Barcelona	50	F	IM	400	808	Sudáfrica	21	4:48.11	63.73	0.78456	73.53	0.679995	85.53	0.58459	65.32	0.765462	22
2013	Cpto M Barcelona	50	F	IM	400	813	Vietnam	16	4:47.60	66.32	0.75392	71.22	0.70205	85.12	0.587406	64.94	0.769941	21
2013	Cpto M Barcelona	50	F	IM	400	816	México	25	4:47.18	65.56	0.76266	73.09	0.684088	84.5	0.591716	64.03	0.780884	20
2013	Cpto M Barcelona	50	F	IM	400	825	Canadá	18	4:46.11	65.13	0.767695	72.16	0.692905	80.34	0.622355	68.48	0.73014	19
2013	Cpto M Barcelona	50	F	IM	400	829	Japón	20	4:45.70	65.56	0.76266	72.6	0.688705	80.08	0.624376	67.46	0.74118	18
2013	Cpto M Barcelona	50	F	IM	400	839	Brasil	26	4:44.55	63.5	0.787402	72.9	0.685871	84.19	0.593895	63.96	0.781739	17
2013	Cpto M Barcelona	50	F	IM	400	839	Suecia	23	4:44.50	63.51	0.787278	73.8	0.677507	81.16	0.616067	66.03	0.757232	16
2013	Cpto M Barcelona	50	F	IM	400	844	Rusia	25	4:44.03	64.6	0.773994	72.01	0.694348	82.05	0.609385	65.37	0.764877	15
2013	Cpto M Barcelona	50	F	IM	400	855	España	18	4:42.78	65.26	0.766166	74.29	0.673038	78.86	0.634035	64.37	0.776759	14
2013	Cpto M Barcelona	50	F	IM	400	859	Italia	19	4:42.33	63.54	0.786906	71.09	0.703334	83.53	0.598587	64.17	0.77918	13
2013	Cpto M Barcelona	50	F	IM	400	863	República Checa	20	4:41.88	64.68	0.773036	70.85	0.705716	82.09	0.609088	64.26	0.778089	12
2013	Cpto M Barcelona	50	F	IM	400	881	Canadá	23	4:39.94	63.3	0.789889	71.69	0.697447	81.32	0.614855	63.63	0.785793	11
2013	Cpto M Barcelona	50	F	IM	400	885	China	15	4:39.54	63.19	0.791264	70.18	0.712454	82.36	0.607091	63.81	0.783576	10
2013	Cpto M Barcelona	50	F	IM	400	896	Reino Unido	20	4:38.43	62.31	0.802439	70.39	0.710328	80.03	0.624766	65.7	0.761035	9
2013	Cpto M Barcelona	50	F	IM	400	888	Japón	19	4:39.21	62.6	0.798722	69.85	0.71582	80.13	0.623986	66.63	0.750413	8
2013	Cpto M Barcelona	50	F	IM	400	895	China	17	4:38.51	63.11	0.792267	65.78	0.760109	82.01	0.609682	62.61	0.798594	7
2013	Cpto M Barcelona	50	F	IM	400	935	Hungria	24	4:34.50	62.59	0.79885	69.58	0.718597	69.51	0.719321	62.82	0.795925	6
2013	Cpto M Barcelona	50	F	IM	400	938	Reino Unido	23	4:34.16	63.31	0.789765	69.82	0.716127	77.96	0.641355	63.07	0.79277	5
2013	Cpto M Barcelona	50	F	IM	400	953	USA	20	4:32.70	62.86	0.795418	68.57	0.729182	78.76	0.63484	62.51	0.799872	4
2013	Cpto M Barcelona	50	F	IM	400	964	USA	20	4:31.69	62.24	0.803342	68.99	0.724743	77.73	0.643252	62.73	0.797067	3
2013	Cpto M Barcelona	50	F	IM	400	969	España	22	4:31.21	61.99	0.806582	69.8	0.716332	77.79	0.642756	61.63	0.811293	2
2013	Cpto M Barcelona	50	F	IM	400	974	Hungria	24	4:30.41	61.43	0.813935	68.28	0.732279	77.94	0.641519	62.76	0.796686	1
2013	Cpto M Barcelona	50	M	IM	200	800	Uzbekistan	21	2:02.79	25.34	1.97316	31.49	1.58781	35.7	1.40056	30.26	1.65235	32
2013	Cpto M Barcelona	50	M	IM	200	803	Bielorrusia	22	2:02.60	26.37	1.89609	30.43	1.64312	36.4	1.37363	29.4	1.70068	31
2013	Cpto M Barcelona	50	M	IM	200	807	Polonia	19	2:02.40	26.41	1.89322	31.39	1.59286	35.5	1.40845	29.1	1.71821	30
2013	Cpto M Barcelona	50	M	IM	200	810	Egipto	22	2:02.29	26.05	1.91939	30.44	1.64258	35.68	1.40135	30.12	1.66003	29
2013	Cpto M Barcelona	50	M	IM	200	811	Alemania	22	2:02.23	25.39	1.96928	30.2	1.65563	35.5	1.40845	31.14	1.60565	28
2013	Cpto M Barcelona	50	M	IM	200	811	Túnez	24	2:02.22	25.8	1.93798	31.45	1.58983	35.1	1.4245	29.87	1.67392	27
2013	Cpto M Barcelona	50	M	IM	200	816	Sudáfrica	20	2:01.96	26.66	1.87547	30.56	1.63613	35.26	1.41804	29.48	1.69607	26
2013	Cpto M Barcelona	50	M	IM	200	817	Austria	21	2:01.92	25.56	1.95618	31.67	1.57878	33.79	1.47973	30.9	1.61812	25
2013	Cpto M Barcelona	50	M	IM	200	821	Luxemburgo	21	2:01.71	26.33	1.89897	31.02	1.61186	36.14	1.38351	28.22	1.77179	24
2013	Cpto M Barcelona	50	M	IM	200	822	Canadá	24	2:01.69	25.72	1.94401	30.6	1.63399	35.14	1.42288	30.23	1.65399	23
2013	Cpto M Barcelona	50	M	IM	200	843	Reino Unido	20	2:00.65	25.6	1.95312	31.11	1.6072	34.55	1.44718	29.39	1.70126	22
2013	Cpto M Barcelona	50	M	IM	200	846	España	19	2:00.49	25.75	1.94175	31.02	1.61186	34.3	1.45773	29.42	1.69952	21
2013	Cpto M Barcelona	50	M	IM	200	854	Israel	21	2:00.13	25.22	1.98255	29.96	1.66889	35.13	1.42328	29.82	1.67673	20
2013	Cpto M Barcelona	50	M	IM	200	856	Italia	26	2:00.02	26.5	1.88679	29.77	1.67954	35.05	1.42653	28.7	1.74216	19
2013	Cpto M Barcelona	50	M	IM	200	857	Israel	26	2:00.01	26.07	1.91791	30.62	1.63292	34.03	1.46929	29.29	1.70707	18
2013	Cpto M Barcelona	50	M	IM	200	857	Francia	25	2:00.00	24.39	2.05002	30.02	1.66556	36.59	1.36649	29	1.72414	17
2013	Cpto M Barcelona	50	M	IM	200	846	Singapur	18	2:00.49	25.97	1.9253	30.39	1.64528	35.15	1.42248	28.98	1.72533	16
2013	Cpto M Barcelona	50	M	IM	200	855	Portugal	25	2:00.09	25.81	1.93723	31.76	1.57431	34.1	1.46628	28.42	1.75932	15
2013	Cpto M Barcelona	50	M	IM	200	864	China	20	1:59.65	26.09	1.91644	31.7	1.57729	34.3	1.45773	27.56	1.81422	14
2013	Cpto M Barcelona	50	M	IM	200	867	Australia	21	1:59.54	25.42	1.96696	29.9	1.67224	34.92	1.43184	29.3	1.70648	13
2013	Cpto M Barcelona	50	M	IM	200	868	Brasil	22	1:59.47	25.53	1.95848	29.78	1.67898	34.55	1.44718	29.61	1.68862	12
2013	Cpto M Barcelona	50	M	IM	200	869	Reino Unido	22	1:59.44	25.64	1.95008	30.4	1.64474	34.09	1.46671	29.31	1.7059	11
2013	Cpto M Barcelona	50	M	IM	200	888	USA	24	1:58.56	24.9	2.00803	30.42	1.64366	34.35	1.4556	28.89	1.7307	10
2013	Cpto M Barcelona	50	M	IM	200	889	Alemania	23	1:58.53	25.24	1.98098	31.06	1.60979	33.46	1.49432	28.77	1.73792	9
2013	Cpto M Barcelona	50	M	IM	200	861	Suecia	26	1:59.79	25.45	1.96464	29.29	1.70707	35.53	1.40726	29.52	1.69377	8
2013	Cpto M Barcelona	50	M	IM	200	891	Japón	19	1:58.45	25.32	1.97472	29.64	1.68691	34.28	1.45858	29.21	1.71174	7
2013	Cpto M Barcelona	50	M	IM	200	904	Australia	21	1:57.88	25.14	1.98886	30.4	1.64474	33.25	1.50376	29.09	1.7188	6
2013	Cpto M Barcelona	50	M	IM	200	908	Hungria	27	1:57.70	24.98	2.0016	29.34	1.70416	34.45	1.45138	28.93	1.72831	5
2013	Cpto M Barcelona	50	M	IM	200	928	China	19	1:56.86	25.09	1.99283	31.59	1.58278	32.76	1.52625	27.42	1.82349	4
2013	Cpto M Barcelona	50	M	IM	200	941	Brasil	27	1:56.30	24.92	2.00642	28.64	1.74581	33.85	1.4771	28.89	1.7307	3
2013	Cpto M Barcelona	50	M	IM	200	942	Japón	18	1:56.29	25.38	1.97006	28.83	1.7343	34.27	1.459	27.81	1.79791	2
2013	Cpto M Barcelona	50	M	IM	200	974	USA	28	1:54.98	24.95	2.00401	28.75	1.73913	33.14	1.50875	28.14	1.77683	1
2013	Cpto M Barcelona	50	M	IM	400	800	Ucrania	19	4:22.65	59	0.847458	70.08	0.71347	72.3	0.691563	61.27	0.81606	20
2013	Cpto M Barcelona	50	M	IM	400	807	Bielorrusia	22	4:21.82	58.76	0.850919	67.29	0.743052	74.93	0.667289	60.84	0.821828	19
2013	Cpto M Barcelona	50	M	IM	400	808	Suecia	26	4:21.74	58.07	0.86103	67.27	0.743273	75.1	0.665779	61.3	0.815661	18
2013	Cpto M Barcelona	50	M	IM	400	813	Sudáfrica	20	4:21.17	59.24	0.844024	66.31	0.754034	74.61	0.670151	61.01	0.819538	17
2013	Cpto M Barcelona	50	M	IM	400	832	Austria	21	4:19.21	58.74	0.851209	65.94	0.758265	71.97	0.694734	62.56	0.799233	16
2013	Cpto M Barcelona	50	M	IM	400	844	Israel	26	4:17.95	58.11	0.860437	67.07	0.74549	71.94	0.695024	60.83	0.821963	15
2013	Cpto M Barcelona	50	M	IM	400	847	Italia	27	4:17.71	59.88	0.835003	63.94	0.781983	73.21	0.682967	60.68	0.823995	14
2013	Cpto M Barcelona	50	M	IM	400	857	Canadá	19	4:16.62	58.11	0.860437	66.02	0.757346	72.83	0.68653	59.66	0.838082	13
2013	Cpto M Barcelona	50	M	IM	400	861	Portugal	21	4:16.30	58.55	0.853971	66.29	0.754262	72.02	0.694252	59.44	0.841184	12
2013	Cpto M Barcelona	50	M	IM	400	861	Alemania	24	4:16.23	56.93	0.878272	63.66	0.785423	75.51	0.662164	60.13	0.831532	11
2013	Cpto M Barcelona	50	M	IM	400	864	Italia	26	4:15.96	58.19	0.859254	64.33	0.777242	74.98	0.666844	58.46	0.855286	10
2013	Cpto M Barcelona	50	M	IM	400	865	Reino Unido	22	4:15.90	57.47	0.870019	64.39	0.776518	72.86	0.686248	61.18	0.817261	9
2013	Cpto M Barcelona	50	M	IM	400	849	Australia	21	4:17.46	56.47	0.885426	65.2	0.766871	75.32	0.663834	60.47	0.826856	8
2013	Cpto M Barcelona	50	M	IM	400	887	Reino Unido	20	4:13.72	57.13	0.875197	66.06	0.756888	70.2	0.712251	60.33	0.828775	7
2013	Cpto M Barcelona	50	M	IM	400	888	Hungria	24	4:13.68	58.03	0.861623	65.74	0.760572	70.32	0.711035	59.59	0.839067	6
2013	Cpto M Barcelona	50	M	IM	400	919	Japón	18	4:10.77	56.35	0.887311	61.56	0.812216	71.77	0.69667	61.09	0.818465	5
2013	Cpto M Barcelona	50	M	IM	400	923	USA	24	4:10.39	57.26	0.87321	62.86	0.795418	72.8	0.686813	57.47	0.870019	4
2013	Cpto M Barcelona	50	M	IM	400	933	Brasil	27	4:09.48	56.63	0.882924	64.54	0.774713	69.98	0.71449	58.33	0.857192	3
2013	Cpto M Barcelona	50	M	IM	400	936	USA	19	4:09.22	57.74	0.865951	64.96	0.769704	68.83	0.726427	57.69	0.866701	2
2013	Cpto M Barcelona	50	M	IM	400	942	Japón	19	4:08.69	56.62	0.88308	63.48	0.78765	69.48	0.719632	59.11	0.845881	1
2014	Cpto M Doha	25	F	IM	200	804	Rusia	22	2:12.45	28.57	1.75009	32.98	1.51607	39.4	1.26904	31.5	1.5873	23
2014	Cpto M Doha	25	F	IM	200	809	Uzbekistan	20	2:12.18	29.34	1.70416	33.35	1.49925	38.35	1.30378	31.14	1.60565	22
2014	Cpto M Doha	25	F	IM	200	810	Vietnam	18	2:12.15	28.67	1.74398	33.5	1.49254	39.48	1.26646	30.5	1.63934	21
2014	Cpto M Doha	25	F	IM	200	824	República Checa	21	2:11.40	27.95	1.78891	32.34	1.54607	39.1	1.27877	32.01	1.56201	20
2014	Cpto M Doha	25	F	IM	200	832	Suecia	18	2:10.94	27.4	1.82482	33.01	1.51469	38.75	1.29032	31.78	1.57332	19
2014	Cpto M Doha	25	F	IM	200	840	Italia	20	2:10.57	27.73	1.8031	32.62	1.5328	39.8	1.25628	30.42	1.64366	18
2014	Cpto M Doha	25	F	IM	200	841	Finlandia	21	2:10.51	28.83	1.7343	32.87	1.52114	37.79	1.3231	31.02	1.61186	17
2014	Cpto M Doha	25	F	IM	200	842	Polonia	22	2:10.46	28.41	1.75994	32.33	1.54655	38.43	1.30107	31.29	1.59795	16
2014	Cpto M Doha	25	F	IM	200	856	Ucrania	27	2:09.75	28.31	1.76616	32.62	1.5328	38.22	1.30822	30.6	1.63399	15
2014	Cpto M Doha	25	F	IM	200	857	China	16	2:09.70	28.1	1.77936	32.14	1.55569	38.71	1.29166	30.75	1.62602	14
2014	Cpto M Doha	25	F	IM	200	864	Australia	22	2:09.31	27.37	1.82682	32.43	1.54178	38.18	1.30959	31.33	1.59591	13
2014	Cpto M Doha	25	F	IM	200	865	Israel	25	2:09.26	27.33	1.82949	32.03	1.56104	37.61	1.32943	32.29	1.54847	12
2014	Cpto M Doha	25	F	IM	200	870	Austria	20	2:09.03	28.26	1.76929	32	1.5625	37.14	1.34626	31.63	1.58078	11
2014	Cpto M Doha	25	F	IM	200	876	España	24	2:08.75	28.25	1.76991	33.12	1.50966	37.69	1.32661	29.69	1.68407	10
2014	Cpto M Doha	25	F	IM	200	876	Japón	18	2:08.74	28.48	1.75562	33.1	1.51057	36.29	1.37779	30.87	1.6197	9
2014	Cpto M Doha	25	F	IM	200	858	Australia	22	2:09.62	27.92	1.79083	32.2	1.5528	38.34	1.30412	31.16	1.60462	8
2014	Cpto M Doha	25	F	IM	200	878	Japón	22	2:08.65	28.35	1.76367	32.68	1.52999	37.14	1.34626	30.48	1.64042	7
2014	Cpto M Doha	25	F	IM	200	911	Hungria	25	2:07.05	27.8	1.79856	31.81	1.57183	38.26	1.30685	29.18	1.7135	6
2014	Cpto M Doha	25	F	IM	200	915	USA	23	2:06.90	27.85	1.79533	32.98	1.51607	35.76	1.39821	30.31	1.64962	5
2014	Cpto M Doha	25	F	IM	200	916	Reino Unido	25	2:06.84	28.64	1.74581	31.57	1.58378	36.2	1.38122	30.43	1.64312	4
2014	Cpto M Doha	25	F	IM	200	919	USA	22	2:06.68	28.1	1.77936	31.65	1.57978	36.91	1.35465	30.02	1.66556	3
2014	Cpto M Doha	25	F	IM	200	937	Reino Unido	19	2:05.87	26.51	1.88608	31.2	1.60256	37.09	1.34807	31.07	1.60927	2
2014	Cpto M Doha	25	F	IM	200	1033	Hungria	25	2:01.86	26.47	1.88893	29.93	1.67056	36.09	1.38543	29.37	1.70242	1
2014	Cpto M Doha	25	F	IM	400	802	China	16	4:40.67	61.62	0.811425	69.3	0.721501	82.52	0.605914	67.23	0.743716	19
2014	Cpto M Doha	25	F	IM	400	820	Dinamarca	18	4:38.58	64.26	0.778089	70.41	0.710126	81.16	0.616067	62.75	0.796813	18
2014	Cpto M Doha	25	F	IM	400	831	Canadá	17	4:37.42	62.94	0.794407	68.52	0.729714	82.51	0.605987	63.45	0.788022	17
2014	Cpto M Doha	25	F	IM	400	833	Eslovenia	26	4:37.23	64.09	0.780153	71.39	0.700378	79.89	0.625861	61.86	0.808277	16
2014	Cpto M Doha	25	F	IM	400	835	Rusia	24	4:36.91	62.31	0.802439	67.61	0.739536	81.91	0.610426	65.08	0.768285	15
2014	Cpto M Doha	25	F	IM	400	845	Finlandia	21	4:35.91	62.98	0.793903	69.33	0.721189	78.92	0.633553	64.68	0.773036	14
2014	Cpto M Doha	25	F	IM	400	858	Vietnam	18	4:34.49	62.88	0.795165	68.57	0.729182	79.87	0.626017	63.17	0.791515	13
2014	Cpto M Doha	25	F	IM	400	867	Australia	22	4:33.52	62.46	0.800512	68.33	0.731743	78.35	0.638162	63.38	0.788892	12
2014	Cpto M Doha	25	F	IM	400	870	Rusia	26	4:33.21	62.19	0.803988	69.2	0.722543	78.48	0.637105	63.34	0.789391	11
2014	Cpto M Doha	25	F	IM	400	876	España	18	4:32.54	62.9	0.794913	69.83	0.716025	79.1	0.632111	62.61	0.798594	10
2014	Cpto M Doha	25	F	IM	400	882	Hungria	25	4:31.95	62.48	0.800256	67.86	0.736811	78.27	0.638814	63.34	0.789391	9
2014	Cpto M Doha	25	F	IM	400	873	Japón	22	4:32.92	62.06	0.805672	70.32	0.711035	76.81	0.650957	63.73	0.78456	8
2014	Cpto M Doha	25	F	IM	400	892	República Checa	21	4:30.95	61.43	0.813935	67.92	0.73616	78.33	0.638325	63.27	0.790264	7
2014	Cpto M Doha	25	F	IM	400	914	USA	23	4:28.74	61.91	0.807624	69.59	0.718494	75.7	0.660502	61.54	0.81248	6
2014	Cpto M Doha	25	F	IM	400	926	Japón	22	4:27.61	62.92	0.79466	68.41	0.730887	73.2	0.68306	62.98	0.793903	5
2014	Cpto M Doha	25	F	IM	400	947	USA	22	4:25.56	62.48	0.800256	66.75	0.749064	75.39	0.663218	60.94	0.820479	4
2014	Cpto M Doha	25	F	IM	400	956	Reino Unido	25	4:24.74	62.16	0.804376	67.02	0.746046	74.09	0.674855	61.47	0.813405	3
2014	Cpto M Doha	25	F	IM	400	976	Hungria	25	4:22.94	60.34	0.828638	64.05	0.78064	75.9	0.658762	62.65	0.798085	2
2014	Cpto M Doha	25	F	IM	400	1011	España	24	4:19.86	60.02	0.833056	66.51	0.751767	73.74	0.678058	59.59	0.839067	1
2014	Cpto M Doha	25	M	IM	200	821	Dinamarca	21	1:57.07	25.37	1.97083	29.31	1.7059	34.51	1.44886	27.88	1.7934	20
2014	Cpto M Doha	25	M	IM	200	824	Austria	22	1:56.92	25.45	1.96464	30.8	1.62338	32.27	1.54943	28.4	1.76056	19
2014	Cpto M Doha	25	M	IM	200	832	Uzbekistan	22	1:56.53	25.51	1.96002	29.65	1.68634	33.89	1.47536	27.48	1.81951	18
2014	Cpto M Doha	25	M	IM	200	836	Rusia	19	1:56.33	25.43	1.96618	29.1	1.71821	33.65	1.48588	28.15	1.7762	17
2014	Cpto M Doha	25	M	IM	200	837	Suiza	20	1:56.31	25.18	1.9857	29.58	1.69033	33.4	1.49701	28.15	1.7762	16
2014	Cpto M Doha	25	M	IM	200	841	Luxemburgo	22	1:56.11	25.22	1.98255	29.65	1.68634	33.12	1.50966	28.12	1.77809	15
2014	Cpto M Doha	25	M	IM	200	843	Grecia	20	1:56.01	24.6	2.03252	28.1	1.77936	34.41	1.45307	28.9	1.7301	14
2014	Cpto M Doha	25	M	IM	200	844	Rusia	26	1:55.98	25.65	1.94932	28.68	1.74338	33.61	1.48765	28.04	1.78317	13
2014	Cpto M Doha	25	M	IM	200	845	Dinamarca	21	1:55.92	25.16	1.98728	29.81	1.67729	33.11	1.51012	27.84	1.79598	12
2014	Cpto M Doha	25	M	IM	200	852	USA	25	1:55.63	25.44	1.96541	28.95	1.72712	33.86	1.47667	27.38	1.82615	11
2014	Cpto M Doha	25	M	IM	200	854	Hungria	26	1:55.55	25.47	1.96309	29.09	1.7188	32.86	1.52161	28.13	1.77746	10
2014	Cpto M Doha	25	M	IM	200	858	Israel	27	1:55.37	25.51	1.96002	29.82	1.67673	32.42	1.54226	27.62	1.81028	9
2014	Cpto M Doha	25	M	IM	200	880	Israel	22	1:54.36	25.09	1.99283	28.19	1.77368	33.5	1.49254	27.58	1.81291	8
2014	Cpto M Doha	25	M	IM	200	888	Portugal	26	1:54.03	24.89	2.00884	28.54	1.75193	33	1.51515	27.6	1.81159	7
2014	Cpto M Doha	25	M	IM	200	891	Polonia	22	1:53.91	24.69	2.02511	28.71	1.74155	33.15	1.5083	27.36	1.82749	6
2014	Cpto M Doha	25	M	IM	200	917	Alemania	23	1:52.81	24.78	2.01776	28.75	1.73913	31.85	1.56986	27.43	1.82282	5
2014	Cpto M Doha	25	M	IM	200	922	Brasil	23	1:52.63	24.34	2.05423	27.66	1.80766	32.48	1.53941	28.15	1.7762	4
2014	Cpto M Doha	25	M	IM	200	943	Japón	20	1:51.79	24.17	2.06868	28.18	1.77431	32.21	1.55231	27.23	1.83621	3
2014	Cpto M Doha	25	M	IM	200	955	USA	30	1:51.31	24.06	2.07814	27.29	1.83217	32.46	1.54036	27.5	1.81818	2
2014	Cpto M Doha	25	M	IM	200	977	Japón	20	1:50.47	24.18	2.06782	27.38	1.82615	32.27	1.54943	26.64	1.87688	1
2014	Cpto M Doha	25	M	IM	400	806	Macedonia	22	4:13.04	57.28	0.872905	64.61	0.773874	70.69	0.707314	60.46	0.826993	25
2014	Cpto M Doha	25	M	IM	400	809	Uzbekistan	22	4:12.71	58.29	0.85778	65.51	0.763242	71.57	0.698617	57.34	0.871992	24
2014	Cpto M Doha	25	M	IM	400	811	Italia	23	4:12.45	57.04	0.876578	64.63	0.773635	79.89	0.625861	60.89	0.821153	23
2014	Cpto M Doha	25	M	IM	400	813	Noruega	18	4:12.32	60.34	0.828638	63.72	0.784683	70.68	0.707414	57.58	0.868357	22
2014	Cpto M Doha	25	M	IM	400	814	Australia	24	4:12.21	56.97	0.877655	63.53	0.78703	72.62	0.688516	59.09	0.846167	21
2014	Cpto M Doha	25	M	IM	400	818	Rusia	26	4:11.74	57	0.877193	62.98	0.793903	70.52	0.709019	61.24	0.81646	20
2014	Cpto M Doha	25	M	IM	400	822	Turquia	19	4:11.35	57.88	0.863856	63.93	0.782105	71.11	0.703136	58.38	0.856458	19
2014	Cpto M Doha	25	M	IM	400	842	Eslovenia	25	4:09.38	56.56	0.884017	62.45	0.800641	71.52	0.699105	58.85	0.849618	18
2014	Cpto M Doha	25	M	IM	400	844	Suiza	20	4:09.14	57.64	0.867453	63.89	0.782595	69.61	0.718288	58	0.862069	17
2014	Cpto M Doha	25	M	IM	400	845	Eslovenia	20	4:09.09	58.33	0.857192	63.17	0.791515	71.63	0.698032	55.96	0.893495	16
2014	Cpto M Doha	25	M	IM	400	845	Brasil	24	4:09.07	55.31	0.903996	63.28	0.790139	69.61	0.718288	60.87	0.821423	15
2014	Cpto M Doha	25	M	IM	400	850	Hungria	18	4:08.55	56.04	0.89222	62.07	0.805542	73.27	0.682408	57.17	0.874585	14
2014	Cpto M Doha	25	M	IM	400	856	Eslovaquia	21	4:07.94	58.19	0.859254	63.38	0.788892	70.54	0.708818	55.83	0.895576	13
2014	Cpto M Doha	25	M	IM	400	857	Austria	22	4:07.91	57.18	0.874432	63.85	0.783085	68.57	0.729182	58.31	0.857486	12
2014	Cpto M Doha	25	M	IM	400	859	Neozelanda	22	4:07.70	57.58	0.868357	61.61	0.811557	70.39	0.710328	58.12	0.860289	11
2014	Cpto M Doha	25	M	IM	400	859	Portugal	26	4:07.68	55.97	0.893336	63.54	0.786906	69.53	0.719114	58.64	0.85266	10
2014	Cpto M Doha	25	M	IM	400	861	China	18	4:07.49	57.18	0.874432	63.62	0.785916	70.72	0.707014	55.97	0.893336	9
2014	Cpto M Doha	25	M	IM	400	856	Israel	27	4:07.99	56.67	0.882301	63.41	0.788519	69.72	0.717154	58.19	0.859254	8
2014	Cpto M Doha	25	M	IM	400	861	Rusia	19	4:07.54	55.84	0.895415	61.75	0.809717	71.17	0.702543	58.78	0.850629	7
2014	Cpto M Doha	25	M	IM	400	884	USA	23	4:05.37	55.82	0.895736	61.85	0.808407	70.05	0.713776	57.65	0.867303	6
2014	Cpto M Doha	25	M	IM	400	905	USA	25	4:03.44	55.67	0.89815	60.63	0.824674	70.18	0.712454	56.96	0.877809	5
2014	Cpto M Doha	25	M	IM	400	921	Sudáfrica	24	4:02.00	54.86	0.911411	62.24	0.803342	67.88	0.736594	57.02	0.876885	4
2014	Cpto M Doha	25	M	IM	400	923	Hungria	26	4:01.82	55.83	0.895576	60.9	0.821018	67.81	0.737354	57.28	0.872905	3
2014	Cpto M Doha	25	M	IM	400	931	Japón	20	4:01.17	54.89	0.910913	60.83	0.821963	69.38	0.720669	56.07	0.891742	2
2014	Cpto M Doha	25	M	IM	400	989	Japón	20	3:56.33	53.82	0.929023	60.17	0.830979	65.94	0.758265	56.4	0.886525	1
2015	Cpto M Kazán	50	F	IM	200	808	Zimbabue	31	2:15.39	29.56	1.69147	31.73	1.5758	40.93	1.2216	33.17	1.50739	25
2015	Cpto M Kazán	50	F	IM	200	813	Uzbekistan	21	2:15.13	29.5	1.69492	34.03	1.46929	39.95	1.25156	31.65	1.57978	24
2015	Cpto M Kazán	50	F	IM	200	814	China	17	2:15.08	29.54	1.69262	33.68	1.48456	39.73	1.25849	32.13	1.55618	23
2015	Cpto M Kazán	50	F	IM	200	814	Suecia	25	2:15.08	29.16	1.71468	34.47	1.45054	39.24	1.27421	32.21	1.55231	22
2015	Cpto M Kazán	50	F	IM	200	825	Suecia	18	2:14.49	27.99	1.78635	33.74	1.48192	39.84	1.25502	32.92	1.51883	21
2015	Cpto M Kazán	50	F	IM	200	832	Islandia	24	2:14.12	28.42	1.75932	34.82	1.43596	37.25	1.34228	33.63	1.48677	20
2015	Cpto M Kazán	50	F	IM	200	836	Austria	20	2:13.90	28.46	1.75685	34.88	1.43349	38.81	1.28833	31.75	1.5748	19
2015	Cpto M Kazán	50	F	IM	200	843	Francia	23	2:13.50	28.66	1.74459	34	1.47059	38.89	1.28568	31.95	1.56495	18
2015	Cpto M Kazán	50	F	IM	200	845	Australia	21	2:13.42	29.08	1.71939	34.03	1.46929	38.78	1.28932	31.53	1.58579	17
2015	Cpto M Kazán	50	F	IM	200	828	Australia	21	2:14.34	28.68	1.74338	35.67	1.40174	36.68	1.36314	33.31	1.50105	16
2015	Cpto M Kazán	50	F	IM	200	847	Vietnam	18	2:13.29	28.85	1.7331	33.74	1.48192	39.27	1.27324	31.43	1.59084	15
2015	Cpto M Kazán	50	F	IM	200	848	Hong Kong	17	2:13.26	28.53	1.75254	34.84	1.43513	38.52	1.29803	31.37	1.59388	14
2015	Cpto M Kazán	50	F	IM	200	860	Brasil	28	2:12.64	28.75	1.73913	33.36	1.4988	40.1	1.24688	30.43	1.64312	13
2015	Cpto M Kazán	50	F	IM	200	873	República Checa	22	2:11.97	28.67	1.74398	33.92	1.47406	38.53	1.29769	30.85	1.62075	12
2015	Cpto M Kazán	50	F	IM	200	874	Hungria	26	2:11.91	27.88	1.7934	33.29	1.50195	38.62	1.29467	32.12	1.55666	11
2015	Cpto M Kazán	50	F	IM	200	882	Japón	23	2:11.53	28.85	1.7331	34.02	1.46972	37.67	1.32732	30.99	1.61342	10
2015	Cpto M Kazán	50	F	IM	200	883	Turquia	17	2:11.46	28.74	1.73974	35.09	1.42491	35.74	1.39899	31.89	1.56789	9
2015	Cpto M Kazán	50	F	IM	200	834	China	19	2:14.01	28.85	1.7331	33.21	1.50557	39.85	1.25471	32.1	1.55763	8
2015	Cpto M Kazán	50	F	IM	200	905	USA	23	2:10.41	28.69	1.74277	33.59	1.48854	37.17	1.34517	30.96	1.61499	7
2015	Cpto M Kazán	50	F	IM	200	907	Canadá	18	2:10.32	28.85	1.7331	32.54	1.53657	37.83	1.3217	31.1	1.60772	6
2015	Cpto M Kazán	50	F	IM	200	909	Reino Unido	25	2:10.19	28.75	1.73913	33.24	1.50421	37.19	1.34445	31.01	1.61238	5
2015	Cpto M Kazán	50	F	IM	200	935	USA	22	2:08.99	28.4	1.76056	32.12	1.55666	37.67	1.32732	30.8	1.62338	4
2015	Cpto M Kazán	50	F	IM	200	940	Reino Unido	19	2:08.77	27.37	1.82682	32.52	1.53752	37.01	1.35099	31.87	1.56887	3
2015	Cpto M Kazán	50	F	IM	200	947	Japón	18	2:08.45	28.73	1.74034	33.57	1.48943	36.04	1.38735	30.11	1.66058	2
2015	Cpto M Kazán	50	F	IM	200	1000	Hungria	26	2:06.12	27.3	1.8315	31.64	1.58028	36.7	1.3624	30.48	1.64042	1
2015	Cpto M Kazán	50	F	IM	400	804	Suecia	25	4:48.65	63.11	0.792267	72.95	0.685401	84.94	0.588651	67.65	0.739098	25
2015	Cpto M Kazán	50	F	IM	400	810	Uzbekistan	21	4:47.85	65.03	0.768876	72.55	0.68918	84.72	0.590179	66.05	0.757002	24
2015	Cpto M Kazán	50	F	IM	400	826	Francia	20	4:46.06	65.34	0.765228	72.46	0.690036	81.64	0.612445	66.62	0.750525	23
2015	Cpto M Kazán	50	F	IM	400	831	Austria	32	4:45.50	65.36	0.764994	71.98	0.694637	81.22	0.615612	65.94	0.758265	22
2015	Cpto M Kazán	50	F	IM	400	836	Australia	21	4:44.93	64.22	0.778574	74.69	0.669434	79.26	0.630835	66.76	0.748951	21
2015	Cpto M Kazán	50	F	IM	400	839	España	20	4:44.51	63.95	0.781861	74.12	0.674582	81.99	0.60983	64.45	0.775795	20
2015	Cpto M Kazán	50	F	IM	400	840	Brasil	28	4:44.40	64.72	0.772559	70.84	0.705816	84.1	0.59453	64.74	0.77232	19
2015	Cpto M Kazán	50	F	IM	400	845	Corea del Sur	30	4:43.83	63.67	0.785299	74.74	0.668986	78.61	0.636051	66.81	0.748391	18
2015	Cpto M Kazán	50	F	IM	400	848	Alemania	26	4:43.51	62.53	0.799616	72.87	0.686153	82.01	0.609682	66.1	0.75643	17
2015	Cpto M Kazán	50	F	IM	400	852	Japón	20	4:43.06	63.51	0.787278	74.69	0.669434	83.2	0.600962	61.66	0.810898	16
2015	Cpto M Kazán	50	F	IM	400	853	China	19	4:42.96	63.46	0.787898	72.46	0.690036	82.76	0.604157	64.28	0.777847	15
2015	Cpto M Kazán	50	F	IM	400	875	Canadá	18	4:40.60	64.21	0.778695	69.63	0.718081	81.27	0.615233	65.49	0.763475	14
2015	Cpto M Kazán	50	F	IM	400	890	Australia	21	4:39.05	63.22	0.790889	70.25	0.711744	81.73	0.61177	63.85	0.783085	13
2015	Cpto M Kazán	50	F	IM	400	890	USA	22	4:38.96	63.58	0.786411	69.93	0.715001	80.55	0.620732	64.9	0.770416	12
2015	Cpto M Kazán	50	F	IM	400	891	Hungria	26	4:38.94	62.52	0.799744	69.62	0.718184	81.7	0.611995	65.1	0.768049	11
2015	Cpto M Kazán	50	F	IM	400	892	Vietnam	18	4:38.78	64.5	0.775194	70.05	0.713776	79.46	0.629247	64.77	0.771962	10
2015	Cpto M Kazán	50	F	IM	400	896	Eslovenia	27	4:38.39	63.71	0.784806	72.47	0.689941	80.56	0.620655	61.65	0.81103	9
2015	Cpto M Kazán	50	F	IM	400	871	Francia	23	4:40.98	62.95	0.794281	72.23	0.692233	79.42	0.629564	66.38	0.753239	8
2015	Cpto M Kazán	50	F	IM	400	892	Reino Unido	22	4:38.75	63.61	0.78604	71.12	0.703037	78.77	0.634759	65.25	0.766284	7
2015	Cpto M Kazán	50	F	IM	400	908	Japón	23	4:37.19	62.57	0.799105	72.07	0.69377	78.19	0.639468	64.36	0.77688	6
2015	Cpto M Kazán	50	F	IM	400	912	República Checa	22	4:36.73	62.64	0.798212	70.79	0.706314	79.91	0.625704	63.39	0.788768	5
2015	Cpto M Kazán	50	F	IM	400	932	Reino Unido	26	4:34.79	63.08	0.792644	70.57	0.708516	77.69	0.643583	63.45	0.788022	4
2015	Cpto M Kazán	50	F	IM	400	955	Canadá	17	4:32.52	61.13	0.817929	70.1	0.713267	78.7	0.635324	62.58	0.798977	3
2015	Cpto M Kazán	50	F	IM	400	964	USA	22	4:31.71	62.35	0.801925	67.54	0.740302	78.49	0.637024	63.33	0.789515	2
2015	Cpto M Kazán	50	F	IM	400	978	Hungria	26	4:30.39	61.15	0.817661	66.85	0.747943	78.23	0.639141	64.16	0.779302	1
2015	Cpto M Kazán	50	M	IM	200	800	Colombia	26	2:02.80	26.15	1.91205	30.67	1.63026	36.35	1.37552	29.63	1.68748	24
2015	Cpto M Kazán	50	M	IM	200	803	Luxemburgo	23	2:02.60	26.43	1.89179	31.91	1.56691	35	1.42857	29.26	1.70882	23
2015	Cpto M Kazán	50	M	IM	200	807	República Checa	21	2:02.43	26.01	1.92234	31.31	1.59693	36.2	1.38122	28.91	1.72951	22
2015	Cpto M Kazán	50	M	IM	200	822	Austria	23	2:01.68	25.84	1.93498	31.2	1.60256	34.56	1.44676	30.08	1.66223	21
2015	Cpto M Kazán	50	M	IM	200	835	Rusia	20	2:01.05	25.84	1.93498	31.38	1.59337	34.47	1.45054	29.36	1.703	20
2015	Cpto M Kazán	50	M	IM	200	937	Italia	28	2:00.94	26.25	1.90476	30.3	1.65017	35.14	1.42288	29.25	1.7094	19
2015	Cpto M Kazán	50	M	IM	200	840	China	23	2:00.80	26.37	1.89609	30.5	1.63934	34.7	1.44092	29.23	1.71057	18
2015	Cpto M Kazán	50	M	IM	200	849	Letonia	21	2:00.39	25.92	1.92901	30.08	1.66223	35.09	1.42491	29.3	1.70648	17
2015	Cpto M Kazán	50	M	IM	200	827	Egipto	23	2:01.41	25.98	1.92456	30.96	1.61499	35.1	1.4245	29.37	1.70242	16
2015	Cpto M Kazán	50	M	IM	200	850	Portugal	27	2:00.31	25.92	1.92901	31.29	1.59795	34.53	1.44802	28.57	1.75009	15
2015	Cpto M Kazán	50	M	IM	200	856	Japón	21	2:00.05	25.77	1.94024	30.89	1.61865	34.4	1.45349	28.99	1.72473	14
2015	Cpto M Kazán	50	M	IM	200	867	Grecia	21	1:59.53	25.99	1.92382	30.15	1.65837	34.4	1.45349	28.99	1.72473	13
2015	Cpto M Kazán	50	M	IM	200	871	Suiza	20	1:59.35	25.56	1.95618	30.77	1.62496	34.01	1.47016	29.01	1.72354	12
2015	Cpto M Kazán	50	M	IM	200	882	Israel	23	1:58.86	25.08	1.99362	29.6	1.68919	34.86	1.43431	29.32	1.70532	11
2015	Cpto M Kazán	50	M	IM	200	882	Australia	23	1:58.83	24.87	2.01045	30.99	1.61342	34.3	1.45773	28.67	1.74398	10
2015	Cpto M Kazán	50	M	IM	200	889	Reino Unido	24	1:58.54	26.1	1.91571	30.16	1.65782	33.45	1.49477	28.83	1.7343	9
2015	Cpto M Kazán	50	M	IM	200	877	Suecia	28	1:59.06	25.48	1.96232	30.18	1.65673	34.36	1.45518	29.04	1.72176	8
2015	Cpto M Kazán	50	M	IM	200	889	Brasil	24	1:58.52	25.42	1.96696	29.71	1.68294	34.21	1.46156	29.18	1.7135	7
2015	Cpto M Kazán	50	M	IM	200	898	Polonia	23	1:58.14	25.48	1.96232	30.32	1.64908	33.92	1.47406	28.42	1.75932	6
2015	Cpto M Kazán	50	M	IM	200	902	USA	26	1:57.96	25.42	1.96696	29.96	1.66889	34.48	1.45012	28.1	1.77936	5
2015	Cpto M Kazán	50	M	IM	200	911	Reino Unido	22	1:57.79	25.32	1.97472	30.4	1.64474	33.21	1.50557	28.66	1.74459	4
2015	Cpto M Kazán	50	M	IM	200	929	China	21	1:56.81	25.03	1.9976	29.95	1.66945	34.17	1.46327	27.66	1.80766	3
2015	Cpto M Kazán	50	M	IM	200	933	Brasil	29	1:56.65	25.22	1.98255	29.05	1.72117	33.37	1.49835	29.01	1.72354	2
2015	Cpto M Kazán	50	M	IM	200	953	USA	31	1:55.81	25.1	1.99203	29.29	1.70707	33.34	1.4997	28.08	1.78063	1
2015	Cpto M Kazán	50	M	IM	400	802	Portugal	23	4:22.35	58.86	0.849473	67.2	0.744048	74.24	0.673491	62.05	0.805802	26
2015	Cpto M Kazán	50	M	IM	400	809	Noruega	18	4:21.67	61.03	0.819269	67.35	0.74239	74.37	0.672314	58.92	0.848608	25
2015	Cpto M Kazán	50	M	IM	400	813	España	22	4:21.26	57.64	0.867453	65.74	0.760572	75.99	0.657981	61.89	0.807885	24
2015	Cpto M Kazán	50	M	IM	400	817	Venezuela	22	4:20.74	58.67	0.852224	65.1	0.768049	75.84	0.659283	61.13	0.817929	23
2015	Cpto M Kazán	50	M	IM	400	820	República Checa	21	4:20.43	59.01	0.847314	66.09	0.756544	75.61	0.661288	59.72	0.83724	22
2015	Cpto M Kazán	50	M	IM	400	823	Sudáfrica	24	4:20.16	56.98	0.877501	65.63	0.761847	73.13	0.683714	64.42	0.776156	21
2015	Cpto M Kazán	50	M	IM	400	832	Austria	23	4:19.20	58.17	0.85955	66.77	0.748839	72.72	0.687569	61.54	0.81248	20
2015	Cpto M Kazán	50	M	IM	400	833	China	21	4:19.11	58.03	0.861623	64.94	0.769941	72.37	0.690894	63.77	0.784068	19
2015	Cpto M Kazán	50	M	IM	400	837	Portugal	27	4:18.67	58.23	0.858664	64.42	0.776156	71.82	0.696185	60.2	0.830565	18
2015	Cpto M Kazán	50	M	IM	400	838	Rusia	20	4:18.61	57.42	0.870777	65.76	0.760341	74.26	0.67331	61.07	0.818733	17
2015	Cpto M Kazán	50	M	IM	400	845	Suiza	21	4:17.90	58.9	0.848896	67.22	0.743826	72.31	0.691467	59.47	0.84076	16
2015	Cpto M Kazán	50	M	IM	400	849	Alemania	21	4:17.42	58.62	0.852951	66.94	0.746938	71.67	0.697642	60.19	0.830703	15
2015	Cpto M Kazán	50	M	IM	400	850	Israel	28	4:17.34	57.53	0.869112	66.91	0.747272	73.67	0.678702	59.23	0.844167	14
2015	Cpto M Kazán	50	M	IM	400	857	Hungria	19	4:16.69	58.07	0.86103	64.11	0.77991	75.22	0.664717	59.29	0.843313	13
2015	Cpto M Kazán	50	M	IM	400	860	Eslovaquia	22	4:16.37	57.99	0.862218	66.22	0.755059	74.17	0.674127	57.99	0.862218	12
2015	Cpto M Kazán	50	M	IM	400	860	Rusia	20	4:16.35	57.67	0.867002	68.12	0.733999	71.83	0.696088	58.73	0.851354	11
2015	Cpto M Kazán	50	M	IM	400	864	Australia	23	4:15.93	57.57	0.868508	65.76	0.760341	74.27	0.673219	58.33	0.857192	10
2015	Cpto M Kazán	50	M	IM	400	867	Italia	28	4:15.70	58.01	0.86192	63.29	0.790014	75.01	0.666578	59.39	0.841893	9
2015	Cpto M Kazán	50	M	IM	400	856	China	23	4:16.74	57.84	0.864454	65.99	0.757691	72.64	0.688326	60.27	0.8296	8
2015	Cpto M Kazán	50	M	IM	400	886	Reino Unido	24	4:13.81	56.59	0.883548	65.87	0.759071	71.13	0.702938	60.22	0.830289	7
2015	Cpto M Kazán	50	M	IM	400	887	Reino Unido	22	4:13.77	56.65	0.882613	65.4	0.764526	71.44	0.699888	60.18	0.830841	6
2015	Cpto M Kazán	50	M	IM	400	905	Alemania	20	4:12.08	59.09	0.846167	65.76	0.760341	71.02	0.704027	56.21	0.889521	5
2015	Cpto M Kazán	50	M	IM	400	909	USA	26	4:11.71	56.82	0.879972	62.58	0.798977	74.05	0.675219	58.26	0.858222	4
2015	Cpto M Kazán	50	M	IM	400	927	USA	21	4:10.05	57.37	0.871536	65.2	0.766871	68.35	0.731529	59.13	0.845594	3
2015	Cpto M Kazán	50	M	IM	400	929	Hungria	26	4:09.90	57.69	0.866701	62.16	0.804376	69.87	0.715615	59.18	0.84488	2
2015	Cpto M Kazán	50	M	IM	400	944	Japón	21	4:08.50	56.1	0.891266	64.02	0.781006	69.44	0.720046	58.94	0.84832	1
2016	JJOO Rio	50	F	IM	200	802	Francia	21	2:15.71	29.42	1.69952	34.23	1.46071	39.89	1.25345	32.17	1.55424	30
2016	JJOO Rio	50	F	IM	200	802	Austria	18	2:15.71	28.84	1.7337	34.85	1.43472	40.22	1.24316	31.8	1.57233	29
2016	JJOO Rio	50	F	IM	200	803	Suecia	19	2:15.66	28.18	1.77431	34.26	1.45943	40.45	1.23609	32.77	1.52579	28
2016	JJOO Rio	50	F	IM	200	804	Italia	17	2:15.61	29.65	1.68634	33.27	1.50286	40.39	1.23793	32.3	1.54799	27
2016	JJOO Rio	50	F	IM	200	809	Serbia	16	2:15.33	29.82	1.67673	33.66	1.48544	40.44	1.2364	31.41	1.59185	26
2016	JJOO Rio	50	F	IM	200	811	Austria	21	2:15.23	28.85	1.7331	34.71	1.44051	39.43	1.26807	32.24	1.55087	25
2016	JJOO Rio	50	F	IM	200	815	Finlandia	23	2:14.97	29.1	1.71821	35.12	1.42369	38.81	1.28833	31.94	1.56544	24
2016	JJOO Rio	50	F	IM	200	817	España	18	2:14.87	29.55	1.69205	33.49	1.49298	40.28	1.24131	31.55	1.58479	23
2016	JJOO Rio	50	F	IM	200	818	China	18	2:14.81	29.28	1.70765	34.1	1.46628	40.03	1.24906	31.4	1.59236	22
2016	JJOO Rio	50	F	IM	200	821	Italia	22	2:14.66	29.47	1.69664	35.08	1.42531	38.64	1.294	31.47	1.58881	21
2016	JJOO Rio	50	F	IM	200	825	República Checa	23	2:14.45	28.41	1.75994	33.58	1.48898	39.87	1.25408	32.59	1.53421	20
2016	JJOO Rio	50	F	IM	200	826	Suecia	26	2:14.41	29.48	1.69607	34.27	1.459	39.66	1.26072	31	1.6129	19
2016	JJOO Rio	50	F	IM	200	838	Suiza	27	2:13.77	28.67	1.74398	33.72	1.4828	38.56	1.29668	32.82	1.52346	18
2016	JJOO Rio	50	F	IM	200	851	Brasil	29	2:13.06	28.76	1.73853	33.87	1.47623	39.4	1.26904	31.03	1.61134	17
2016	JJOO Rio	50	F	IM	200	846	España	25	2:13.33	29.07	1.71999	34.8	1.43678	38.93	1.28436	30.53	1.63773	16
2016	JJOO Rio	50	F	IM	200	861	Japón	15	2:12.53	28.57	1.75009	34.33	1.45645	38.39	1.30242	31.24	1.60051	15
2016	JJOO Rio	50	F	IM	200	867	Canadá	21	2:12.25	28.87	1.7319	33.99	1.47102	37.86	1.32066	31.53	1.58579	14
2016	JJOO Rio	50	F	IM	200	869	Reino Unido	27	2:12.15	29.71	1.68294	33.41	1.49656	37.95	1.31752	31.08	1.60875	13
2016	JJOO Rio	50	F	IM	200	869	Corea del Sur	22	2:12.15	28.39	1.76118	32.88	1.52068	39.17	1.27649	31.71	1.57679	12
2016	JJOO Rio	50	F	IM	200	869	Alemania	21	2:12.13	27.89	1.79276	34.46	1.45096	37.88	1.31996	31.9	1.5674	11
2016	JJOO Rio	50	F	IM	200	871	Hungria	27	2:12.05	28	1.78571	33.98	1.47145	38.18	1.30959	31.89	1.56789	10
2016	JJOO Rio	50	F	IM	200	891	Japón	21	2:11.03	28.36	1.76305	34.48	1.45012	36.74	1.36091	31.45	1.58983	9
2016	JJOO Rio	50	F	IM	200	842	China	20	2:13.56	28.49	1.755	33.79	1.47973	39.21	1.27518	32.07	1.55909	8
2016	JJOO Rio	50	F	IM	200	866	Rusia	24	2:12.28	28.34	1.76429	33.59	1.48854	39.56	1.2639	30.79	1.6239	7
2016	JJOO Rio	50	F	IM	200	887	Canadá	19	2:11.22	28.8	1.73611	33.25	1.50376	37.52	1.33262	31.65	1.57978	6
2016	JJOO Rio	50	F	IM	200	894	Australia	28	2:10.88	27.73	1.8031	33.48	1.49343	38.78	1.28932	30.89	1.61865	5
2016	JJOO Rio	50	F	IM	200	929	USA	24	2:09.21	28.21	1.77242	33.2	1.50602	36.94	1.35355	30.86	1.62022	4
2016	JJOO Rio	50	F	IM	200	939	USA	23	2:08.79	28.02	1.78444	31.88	1.56838	38.11	1.31199	30.78	1.62443	3
2016	JJOO Rio	50	F	IM	200	982	Reino Unido	20	2:06.88	27.31	1.83083	32.3	1.54799	36.88	1.35575	30.39	1.64528	2
2016	JJOO Rio	50	F	IM	200	989	Hungria	27	2:06.58	27.23	1.83621	31.66	1.57928	36.83	1.35759	30.86	1.62022	1
2016	JJOO Rio	50	F	IM	400	805	Italia	17	4:48.48	56.77	0.880747	71.48	0.699496	82.98	0.602555	67.25	0.743494	30
2016	JJOO Rio	50	F	IM	400	811	Austria	33	4:47.84	65.32	0.765462	72.29	0.691659	83.83	0.596445	66.4	0.753012	29
2016	JJOO Rio	50	F	IM	400	826	Portugal	20	4:46.03	65.07	0.768403	73.56	0.679717	79.37	0.629961	68.03	0.73497	28
2016	JJOO Rio	50	F	IM	400	828	China	20	4:45.86	63.37	0.789017	72.11	0.693385	82.84	0.603573	67.54	0.740302	27
2016	JJOO Rio	50	F	IM	400	830	Italia	22	4:45.52	65.21	0.766754	74.66	0.669703	81.42	0.6141	64.23	0.778452	26
2016	JJOO Rio	50	F	IM	400	832	Finlandia	23	4:45.33	64.46	0.775675	73.77	0.677782	81.76	0.611546	65.34	0.765228	25
2016	JJOO Rio	50	F	IM	400	834	Suiza	27	4:45.12	63.26	0.790389	71.9	0.69541	86.33	0.579173	63.63	0.785793	24
2016	JJOO Rio	50	F	IM	400	840	Francia	21	4:44.47	65.38	0.76476	73.57	0.679625	78.75	0.634921	66.77	0.748839	23
2016	JJOO Rio	50	F	IM	400	844	Francia	24	4:43.98	62.8	0.796178	74.82	0.668271	80.26	0.622975	66.1	0.75643	22
2016	JJOO Rio	50	F	IM	400	850	Alemania	27	4:43.32	63.37	0.789017	74.66	0.669703	81.5	0.613497	63.79	0.783822	21
2016	JJOO Rio	50	F	IM	400	851	Serbia	16	4:43.19	64.65	0.773395	70.83	0.705916	80.53	0.620887	67.18	0.744269	20
2016	JJOO Rio	50	F	IM	400	857	España	20	4:42.52	63.18	0.79139	73.3	0.682128	81.08	0.616675	64.96	0.769704	19
2016	JJOO Rio	50	F	IM	400	864	Turquia	18	4:41.79	63.5	0.787402	74.11	0.674673	75.38	0.663306	68.8	0.726744	18
2016	JJOO Rio	50	F	IM	400	886	Croacia	21	4:39.41	65.73	0.760688	68.22	0.732923	80.31	0.622587	65.15	0.76746	17
2016	JJOO Rio	50	F	IM	400	891	Australia	25	4:38.91	63.41	0.788519	70.65	0.707714	80.74	0.619272	64.11	0.77991	16
2016	JJOO Rio	50	F	IM	400	891	Brasil	29	4:38.88	63.06	0.792896	71.9	0.69541	81.84	0.610948	62.08	0.805412	15
2016	JJOO Rio	50	F	IM	400	895	República Checa	23	4:38.53	63.43	0.788271	69.57	0.718701	80.54	0.62081	64.99	0.769349	14
2016	JJOO Rio	50	F	IM	400	895	Hungria	27	4:38.52	62.17	0.804246	69.54	0.719011	81.6	0.612745	65.21	0.766754	13
2016	JJOO Rio	50	F	IM	400	899	Canadá	19	4:38.06	64.16	0.779302	71.05	0.70373	78.64	0.635809	64.21	0.778695	12
2016	JJOO Rio	50	F	IM	400	906	Japón	23	4:37.33	63.77	0.784068	69.68	0.717566	78.37	0.637999	65.51	0.763242	11
2016	JJOO Rio	50	F	IM	400	906	Australia	22	4:37.33	63.51	0.787278	69.32	0.721293	81.06	0.616827	63.44	0.788146	10
2016	JJOO Rio	50	F	IM	400	911	Vietnam	19	4:36.85	63.39	0.788768	70.07	0.713572	79.54	0.628615	63.85	0.783085	9
2016	JJOO Rio	50	F	IM	400	899	Japón	24	4:38.06	62.03	0.806062	72.56	0.689085	78.6	0.636132	74.87	0.667824	8
2016	JJOO Rio	50	F	IM	400	929	Reino Unido	23	4:35.04	62.55	0.799361	70.93	0.70492	77.7	0.643501	63.86	0.782963	7
2016	JJOO Rio	50	F	IM	400	930	USA	23	4:34.98	63.86	0.782963	68.82	0.726533	79.3	0.630517	63	0.793651	6
2016	JJOO Rio	50	F	IM	400	933	Canadá	18	4:34.70	62.42	0.801025	69.85	0.71582	80.73	0.619348	61.7	0.810373	5
2016	JJOO Rio	50	F	IM	400	955	Reino Unido	26	4:32.54	62.93	0.794534	70.15	0.712758	76.76	0.651381	62.7	0.797448	4
2016	JJOO Rio	50	F	IM	400	957	España	25	4:32.39	62.16	0.804376	70.58	0.708416	78.33	0.638325	61.32	0.815395	3
2016	JJOO Rio	50	F	IM	400	970	USA	23	4:31.15	62.77	0.796559	68.17	0.73346	78.1	0.640205	62.11	0.805023	2
2016	JJOO Rio	50	F	IM	400	1023	Hungria	27	4:26.36	60.91	0.820883	67.48	0.74096	76.11	0.656944	61.86	0.808277	1
2016	JJOO Rio	50	M	IM	200	805	Macedonia	23	2:02.54	26.47	1.88893	32.12	1.55666	34.37	1.45476	29.58	1.69033	26
2016	JJOO Rio	50	M	IM	200	808	Egipto	24	2:02.36	25.95	1.92678	30.36	1.6469	35.91	1.39237	30.14	1.65893	25
2016	JJOO Rio	50	M	IM	200	809	Letonia	22	2:02.34	26.36	1.89681	30.67	1.63026	35.23	1.41924	30.08	1.66223	24
2016	JJOO Rio	50	M	IM	200	828	Bélgica	23	2:01.36	26.23	1.90621	30.16	1.65782	36.57	1.36724	28.4	1.76056	23
2016	JJOO Rio	50	M	IM	200	842	China	21	2:00.70	25.74	1.9425	29.94	1.67001	34.82	1.43596	30.2	1.65563	22
2016	JJOO Rio	50	M	IM	200	852	Luxemburgo	24	2:00.21	25.3	1.97628	30.58	1.63506	35.24	1.41884	29.09	1.7188	21
2016	JJOO Rio	50	M	IM	200	853	Australia	26	2:00.18	25.63	1.95084	29.7	1.6835	35.42	1.41163	29.43	1.69895	20
2016	JJOO Rio	50	M	IM	200	853	Portugal	28	2:00.17	25.43	1.96618	31.22	1.60154	34.2	1.46199	29.32	1.70532	19
2016	JJOO Rio	50	M	IM	200	860	Rusia	21	1:59.86	25.89	1.93125	30.76	1.62549	34.06	1.468	29.15	1.71527	18
2016	JJOO Rio	50	M	IM	200	861	Israel	29	1:59.80	25.76	1.94099	31.54	1.58529	33.84	1.47754	28.66	1.74459	17
2016	JJOO Rio	50	M	IM	200	840	Suecia	29	2:00.81	25.62	1.9516	30.67	1.63026	35.33	1.41523	29.19	1.71292	16
2016	JJOO Rio	50	M	IM	200	847	España	22	2:00.47	25.84	1.93498	30.83	1.6218	34.44	1.4518	29.36	1.703	15
2016	JJOO Rio	50	M	IM	200	847	Neozelanda	20	2:00.45	25.81	1.93723	30.73	1.62707	34.74	1.43926	29.17	1.71409	14
2016	JJOO Rio	50	M	IM	200	849	Suiza	22	2:00.38	25.57	1.95542	30.93	1.61655	34.96	1.43021	28.92	1.72891	13
2016	JJOO Rio	50	M	IM	200	855	Portugal	24	2:00.08	25.65	1.94932	30.47	1.64096	34.94	1.43102	29.02	1.72295	12
2016	JJOO Rio	50	M	IM	200	867	Grecia	22	1:59.54	25.06	1.99521	29.6	1.68919	35.1	1.4245	29.78	1.67898	11
2016	JJOO Rio	50	M	IM	200	868	Reino Unido	23	1:59.49	25.72	1.94401	30.52	1.63827	34.19	1.46242	29.06	1.72058	10
2016	JJOO Rio	50	M	IM	200	874	Brasil	25	1:59.23	25.41	1.96773	30.16	1.65782	34.67	1.44217	28.99	1.72473	9
2016	JJOO Rio	50	M	IM	200	889	Reino Unido	23	1:58.54	25.12	1.99045	30.86	1.62022	33.45	1.49477	29.11	1.71762	8
2016	JJOO Rio	50	M	IM	200	901	Brasil	30	1:58.02	24.74	2.02102	28.71	1.74155	33.92	1.47406	30.65	1.63132	7
2016	JJOO Rio	50	M	IM	200	913	Alemania	25	1:57.48	25.28	1.97785	30.25	1.65289	33.53	1.4912	28.42	1.75932	6
2016	JJOO Rio	50	M	IM	200	913	USA	32	1:57.47	25.03	1.9976	28.41	1.75994	34.65	1.443	29.38	1.70184	5
2016	JJOO Rio	50	M	IM	200	920	Japón	25	1:57.21	25.24	1.98098	29.45	1.69779	33.48	1.49343	29.04	1.72176	4
2016	JJOO Rio	50	M	IM	200	923	China	22	1:57.05	25.21	1.98334	29.87	1.67392	34.22	1.46113	27.75	1.8018	3
2016	JJOO Rio	50	M	IM	200	934	Japón	21	1:56.61	25.03	1.9976	29.36	1.703	34.4	1.45349	27.82	1.79727	2
2016	JJOO Rio	50	M	IM	200	982	USA	31	1:54.66	24.91	2.00723	28.54	1.75193	33.51	1.49209	27.7	1.80505	1
2016	JJOO Rio	50	M	IM	400	805	República Checa	22	4:22.09	58.77	0.850774	66.87	0.747719	76.11	0.656944	60.34	0.828638	24
2016	JJOO Rio	50	M	IM	400	821	Luxemburgo	24	4:20.37	58.44	0.855578	67.25	0.743494	74.02	0.675493	60.66	0.824266	23
2016	JJOO Rio	50	M	IM	400	832	Liechestein	23	4:19.19	57.92	0.86326	69.7	0.71736	69.86	0.715717	61.61	0.811557	22
2016	JJOO Rio	50	M	IM	400	837	Sudáfrica	25	4:18.72	57.05	0.876424	65.72	0.760803	74.66	0.669703	61.29	0.815794	21
2016	JJOO Rio	50	M	IM	400	840	Italia	29	4:18.39	58.5	0.854701	63.01	0.793525	75.06	0.666134	59.82	0.835841	20
2016	JJOO Rio	50	M	IM	400	841	Israel	29	4:18.29	58.21	0.858959	66.74	0.749176	72.83	0.68653	60.51	0.82631	19
2016	JJOO Rio	50	M	IM	400	841	Alemania	17	4:18.25	58.4	0.856164	66.49	0.751993	72.87	0.686153	60.49	0.826583	18
2016	JJOO Rio	50	M	IM	400	842	Sudáfrica	23	4:18.13	58.1	0.860585	65.52	0.763126	72.89	0.685965	61.62	0.811425	17
2016	JJOO Rio	50	M	IM	400	845	Italia	30	4:17.88	59.72	0.83724	64.8	0.771605	73.24	0.682687	60.12	0.83167	16
2016	JJOO Rio	50	M	IM	400	851	Brasil	19	4:17.25	58.44	0.855578	63.09	0.792519	75.45	0.662691	60.27	0.8296	15
2016	JJOO Rio	50	M	IM	400	865	Portugal	24	4:15.84	58.57	0.853679	66.61	0.750638	71.63	0.698032	59.03	0.847027	14
2016	JJOO Rio	50	M	IM	400	869	Suiza	21	4:15.46	57.63	0.867604	66.41	0.752899	71.52	0.699105	59.9	0.834725	13
2016	JJOO Rio	50	M	IM	400	873	Hungria	27	4:15.04	57.48	0.869868	64.09	0.780153	72.33	0.691276	61.14	0.817795	12
2016	JJOO Rio	50	M	IM	400	876	Hungria	24	4:14.81	58.38	0.856458	64.76	0.772082	72.2	0.692521	59.47	0.84076	11
2016	JJOO Rio	50	M	IM	400	879	China	22	4:14.46	57.3	0.8726	64.06	0.780518	74	0.675676	59.1	0.846024	10
2016	JJOO Rio	50	M	IM	400	886	Eslovaquia	23	4:13.87	58.61	0.853097	65.59	0.762311	71.5	0.699301	58.17	0.85955	9
2016	JJOO Rio	50	M	IM	400	858	España	19	4:16.58	58.13	0.860141	65.17	0.767224	73.87	0.676865	59.41	0.841609	8
2016	JJOO Rio	50	M	IM	400	869	Australia	26	4:15.48	57.28	0.872905	63.8	0.783699	74.32	0.672766	60.08	0.832224	7
2016	JJOO Rio	50	M	IM	400	907	Australia	24	4:11.90	55.94	0.893815	64.65	0.773395	73.14	0.68362	58.17	0.85955	6
2016	JJOO Rio	50	M	IM	400	909	USA	20	4:11.68	57.14	0.875044	64.02	0.781006	73.74	0.678058	56.78	0.880592	5
2016	JJOO Rio	50	M	IM	400	910	Reino Unido	21	4:11.62	57.37	0.871536	64.49	0.775314	71.48	0.699496	58.28	0.857927	4
2016	JJOO Rio	50	M	IM	400	931	Japón	22	4:09.71	55.23	0.905305	63.96	0.781739	69.87	0.715615	60.65	0.824402	3
2016	JJOO Rio	50	M	IM	400	965	USA	22	4:06.75	56.52	0.884643	64.04	0.780762	68.14	0.733783	58.05	0.861326	2
2016	JJOO Rio	50	M	IM	400	973	Japón	21	4:06.05	55.57	0.899766	62.16	0.804376	70.23	0.711946	58.09	0.860733	1
2016	Cpto M Windsor	25	F	IM	200	801	República Checa	25	2:11.21	28.39	1.76118	33.21	1.50557	38.08	1.31303	31.53	1.58579	12
2016	Cpto M Windsor	25	F	IM	200	803	Suiza	27	2:11.10	27.95	1.78891	32.47	1.53988	39.64	1.26135	31.04	1.61082	11
2016	Cpto M Windsor	25	F	IM	200	810	Vietnam	20	2:10.69	27.89	1.79276	33.29	1.50195	38.24	1.30753	31.27	1.59898	10
2016	Cpto M Windsor	25	F	IM	200	838	Reino Unido	27	2:09.22	28.66	1.74459	32.05	1.56006	37.61	1.32943	30.9	1.61812	9
2016	Cpto M Windsor	25	F	IM	200	843	Hungria	27	2:08.95	27.92	1.79083	32.44	1.54131	37.92	1.31857	30.67	1.63026	8
2016	Cpto M Windsor	25	F	IM	200	845	Japón	21	2:08.89	28.14	1.77683	32.31	1.54751	37.97	1.31683	30.47	1.64096	7
2016	Cpto M Windsor	25	F	IM	200	851	Canadá	17	2:08.59	27.73	1.8031	32.13	1.55618	37.31	1.34012	31.42	1.59134	6
2016	Cpto M Windsor	25	F	IM	200	853	Japón	22	2:08.47	27.55	1.81488	33.5	1.49254	35.77	1.39782	31.65	1.57978	5
2016	Cpto M Windsor	25	F	IM	200	874	Australia	24	2:07.41	27.4	1.82482	31.67	1.57878	38.21	1.30856	30.13	1.65948	4
2016	Cpto M Windsor	25	F	IM	200	906	USA	21	2:05.93	27.53	1.8162	32.03	1.56104	36.47	1.37099	29.9	1.67224	3
2016	Cpto M Windsor	25	F	IM	200	926	USA	19	2:05.02	27.79	1.79921	31.05	1.61031	36.12	1.38427	30.06	1.66334	2
2016	Cpto M Windsor	25	F	IM	200	974	Hungria	27	2:02.90	26.82	1.86428	30.46	1.6415	35.75	1.3986	29.87	1.67392	1
2016	Cpto M Windsor	25	F	IM	400	811	Francia	22	4:38.18	63.17	0.791515	69.39	0.720565	79.87	0.626017	65.75	0.760456	12
2016	Cpto M Windsor	25	F	IM	400	815	Japón	21	4:37.66	63.07	0.79277	70.29	0.711339	80.38	0.622045	63.92	0.782228	11
2016	Cpto M Windsor	25	F	IM	400	833	Canadá	17	4:35.66	61.59	0.81182	68.48	0.73014	78.89	0.633794	66.7	0.749625	10
2016	Cpto M Windsor	25	F	IM	400	841	Reino Unido	17	4:34.78	61.97	0.806842	70.06	0.713674	77.82	0.642508	64.93	0.77006	9
2016	Cpto M Windsor	25	F	IM	400	844	USA	20	4:34.50	61.15	0.817661	68.97	0.724953	69.38	0.720669	65	0.769231	8
2016	Cpto M Windsor	25	F	IM	400	814	República Checa	23	4:37.79	62.62	0.798467	69.7	0.71736	69.87	0.715615	65.6	0.762195	7
2016	Cpto M Windsor	25	F	IM	400	857	Japón	21	4:33.07	62.77	0.796559	68.9	0.725689	79.12	0.631951	62.28	0.802826	6
2016	Cpto M Windsor	25	F	IM	400	858	España	26	4:32.98	62.26	0.803084	71.37	0.700574	76.98	0.649519	62.37	0.801667	5
2016	Cpto M Windsor	25	F	IM	400	908	Reino Unido	27	4:27.86	62.48	0.800256	68.04	0.734862	75.58	0.661551	71.76	0.696767	4
2016	Cpto M Windsor	25	F	IM	400	909	USA	21	4:27.78	62.04	0.805932	69.24	0.722126	75.7	0.660502	60.8	0.822368	3
2016	Cpto M Windsor	25	F	IM	400	910	USA	19	4:27.74	62.3	0.802568	68.89	0.725795	75.52	0.662076	61.02	0.819403	2
2016	Cpto M Windsor	25	F	IM	400	974	Hungria	27	4:21.67	59.69	0.837661	65.92	0.758495	74.77	0.668717	61.29	0.815794	1
2016	Cpto M Windsor	25	M	IM	200	802	Noruega	21	1:57.98	25.66	1.94856	28.73	1.74034	34.65	1.443	28.94	1.72771	24
2016	Cpto M Windsor	25	M	IM	200	804	USA	17	1:57.87	24.49	2.04165	28.79	1.73671	33.51	1.49209	31.08	1.60875	23
2016	Cpto M Windsor	25	M	IM	200	808	Dinamarca	23	1:57.68	25.2	1.98413	29.63	1.68748	34.27	1.459	28.58	1.74948	22
2016	Cpto M Windsor	25	M	IM	200	812	Hungria	21	1:57.51	25.42	1.96696	29.28	1.70765	33.85	1.4771	28.96	1.72652	21
2016	Cpto M Windsor	25	M	IM	200	816	Holanda	20	1:57.30	25.03	1.9976	29.49	1.69549	33.87	1.47623	28.91	1.72951	20
2016	Cpto M Windsor	25	M	IM	200	816	China	22	1:57.30	25.44	1.96541	30.01	1.66611	33.71	1.48324	28.14	1.77683	19
2016	Cpto M Windsor	25	M	IM	200	817	Sudáfrica	19	1:57.27	25.61	1.95236	28.94	1.72771	34.59	1.4455	28.13	1.77746	18
2016	Cpto M Windsor	25	M	IM	200	824	Canadá	20	1:56.90	25.9	1.9305	29.23	1.71057	32.84	1.52253	28.93	1.72831	17
2016	Cpto M Windsor	25	M	IM	200	829	Austria	24	1:56.69	25.62	1.9516	29.63	1.68748	32.93	1.51837	28.51	1.75377	16
2016	Cpto M Windsor	25	M	IM	200	849	Portugal	24	1:55.77	25.29	1.97707	28.9	1.7301	33.7	1.48368	27.88	1.7934	15
2016	Cpto M Windsor	25	M	IM	200	854	Brasil	26	1:55.51	24.87	2.01045	28.88	1.7313	33.02	1.51423	28.74	1.73974	14
2016	Cpto M Windsor	25	M	IM	200	854	Suiza	22	1:55.51	25.06	1.99521	28.93	1.72831	33.63	1.48677	27.89	1.79276	13
2016	Cpto M Windsor	25	M	IM	200	860	Portugal	28	1:55.26	24.84	2.01288	28.68	1.74338	32.98	1.51607	28.76	1.73853	12
2016	Cpto M Windsor	25	M	IM	200	863	Australia	19	1:55.13	24.76	2.01939	28.72	1.74095	34.14	1.46456	27.51	1.81752	11
2016	Cpto M Windsor	25	M	IM	200	865	Rusia	22	1:55.03	25.1	1.99203	29.55	1.69205	32.47	1.53988	27.91	1.79147	10
2016	Cpto M Windsor	25	M	IM	200	878	Suecia	30	1:54.47	24.6	2.03252	28.93	1.72831	32.88	1.52068	28.06	1.7819	9
2016	Cpto M Windsor	25	M	IM	200	848	Grecia	22	1:55.80	24.56	2.03583	28.57	1.75009	34.01	1.47016	28.66	1.74459	8
2016	Cpto M Windsor	25	M	IM	200	854	Japón	22	1:55.51	25.62	1.9516	28.95	1.72712	32.95	1.51745	27.99	1.78635	7
2016	Cpto M Windsor	25	M	IM	200	878	Reino Unido	21	1:54.45	25.07	1.99442	28.31	1.76616	33.29	1.50195	27.78	1.79986	6
2016	Cpto M Windsor	25	M	IM	200	901	Rusia	20	1:53.47	24.05	2.079	28.99	1.72473	32.69	1.52952	27.74	1.80245	5
2016	Cpto M Windsor	25	M	IM	200	915	USA	23	1:52.91	24.08	2.07641	28.73	1.74034	32.32	1.54703	27.78	1.79986	4
2016	Cpto M Windsor	25	M	IM	200	915	Japón	22	1:52.89	24.99	2.0008	28.51	1.75377	31.91	1.56691	27.48	1.81951	3
2016	Cpto M Windsor	25	M	IM	200	936	Alemania	25	1:52.07	24.85	2.01207	28.68	1.74338	31.99	1.56299	26.55	1.88324	2
2016	Cpto M Windsor	25	M	IM	200	944	China	22	1:51.74	24.16	2.06954	27.97	1.78763	32.65	1.53139	26.96	1.8546	1
2016	Cpto M Windsor	25	M	IM	400	809	Canadá	20	4:12.73	58.84	0.849762	64.6	0.773994	70.89	0.705318	58.4	0.856164	21
2016	Cpto M Windsor	25	M	IM	400	816	Sudáfrica	19	4:12.00	57.85	0.864304	62.09	0.805283	72.27	0.69185	59.79	0.83626	20
2016	Cpto M Windsor	25	M	IM	400	816	Portugal	28	4:11.92	56.48	0.885269	64.07	0.780396	70.39	0.710328	60.98	0.819941	19
2016	Cpto M Windsor	25	M	IM	400	818	Portugal	18	4:11.80	57.41	0.870928	62.69	0.797575	71.97	0.694734	59.73	0.8371	18
2016	Cpto M Windsor	25	M	IM	400	826	República Checa	22	4:10.96	56.92	0.878426	64.14	0.779545	71.73	0.697058	58.17	0.85955	17
2016	Cpto M Windsor	25	M	IM	400	833	Ecuador	20	4:10.27	58.17	0.85955	63.74	0.784437	70.48	0.709421	57.88	0.863856	16
2016	Cpto M Windsor	25	M	IM	400	839	China	23	4:09.63	57.21	0.873973	66.45	0.752445	68.69	0.727908	57.28	0.872905	15
2016	Cpto M Windsor	25	M	IM	400	841	Austria	24	4:09.46	57.13	0.875197	63.43	0.788271	69.98	0.71449	58.92	0.848608	14
2016	Cpto M Windsor	25	M	IM	400	842	Suiza	22	4:09.38	57.86	0.864155	63.1	0.792393	70.07	0.713572	58.35	0.856898	13
2016	Cpto M Windsor	25	M	IM	400	850	Australia	19	4:05.52	56.87	0.879198	61.2	0.816993	71.78	0.696573	58.67	0.852224	12
2016	Cpto M Windsor	25	M	IM	400	856	España	20	4:08.01	57.42	0.870777	62.71	0.797321	70.02	0.714082	57.86	0.864155	11
2016	Cpto M Windsor	25	M	IM	400	864	Eslovaquia	23	4:07.19	56.78	0.880592	63.79	0.783822	69.61	0.718288	56.72	0.881523	10
2016	Cpto M Windsor	25	M	IM	400	876	Brasil	19	4:06.09	56.2	0.88968	59.51	0.840195	72.05	0.693963	58.33	0.857192	9
2016	Cpto M Windsor	25	M	IM	400	877	USA	20	4:06.02	55.04	0.90843	62.4	0.801282	70.31	0.711136	58.27	0.858074	8
2016	Cpto M Windsor	25	M	IM	400	889	Japón	22	4:04.90	55.78	0.896379	61.34	0.815129	69.63	0.718081	58.15	0.859845	7
2016	Cpto M Windsor	25	M	IM	400	889	Hungria	25	4:04.89	56.03	0.44619	61.44	0.813802	70.11	0.713165	57.31	0.872448	6
2016	Cpto M Windsor	25	M	IM	400	892	Reino Unido	21	4:04.57	56.16	0.445157	62.42	0.801025	68.94	0.725268	57.05	0.876424	5
2016	Cpto M Windsor	25	M	IM	400	922	USA	23	4:01.94	54.17	0.46151	62.39	0.80141	66.85	0.747943	58.53	0.854263	4
2016	Cpto M Windsor	25	M	IM	400	926	Hungria	28	4:01.56	55.87	0.447467	60.27	0.8296	67.82	0.737246	57.6	0.868056	3
2016	Cpto M Windsor	25	M	IM	400	937	Reino Unido	21	4:00.66	55.79	0.448109	61.2	0.816993	68.35	0.731529	55.32	0.903832	2
2016	Cpto M Windsor	25	M	IM	400	953	Japón	22	3:59.24	54.3	0.460405	60.47	0.826856	66.9	0.747384	57.57	0.868508	1
2017	Cpto M Budapest	50	F	IM	200	814	Holanda	23	2:15.05	29.06	1.72058	35.15	1.42248	38.96	1.28337	31.88	1.56838	26
2017	Cpto M Budapest	50	F	IM	200	820	Finlandia	22	2:14.70	28.46	1.75685	34.16	1.4637	37.99	1.31614	34.09	1.46671	25
2017	Cpto M Budapest	50	F	IM	200	827	Portugal	21	2:14.33	28.81	1.73551	34.27	1.459	38.17	1.30993	33.08	1.51149	24
2017	Cpto M Budapest	50	F	IM	200	828	República Checa	25	2:14.26	29.32	1.70532	34.32	1.45688	39.05	1.28041	31.57	1.58378	23
2017	Cpto M Budapest	50	F	IM	200	833	China	23	2:13.99	28.25	1.76991	34.13	1.46499	39.74	1.25818	31.87	1.56887	22
2017	Cpto M Budapest	50	F	IM	200	835	Neozelanda	22	2:13.91	28.51	1.75377	34	1.47059	38.51	1.29836	32.89	1.52022	21
2017	Cpto M Budapest	50	F	IM	200	837	España	26	2:13.82	29.41	1.7001	35.38	1.41323	38.6	1.29534	30.43	1.64312	20
2017	Cpto M Budapest	50	F	IM	200	842	Turquia	19	2:13.56	29.28	1.70765	35.34	1.41483	37.01	1.35099	31.93	1.56593	19
2017	Cpto M Budapest	50	F	IM	200	845	Vietnam	20	2:13.36	28.91	1.72951	34.07	1.46757	39.58	1.26326	30.8	1.62338	18
2017	Cpto M Budapest	50	F	IM	200	849	Rusia	25	2:13.16	28.5	1.75439	34.04	1.46886	39.09	1.2791	31.53	1.58579	17
2017	Cpto M Budapest	50	F	IM	200	832	Australia	23	2:14.07	28.48	1.75562	34.36	1.45518	39.28	1.27291	31.95	1.56495	16
2017	Cpto M Budapest	50	F	IM	200	852	China	21	2:13.01	28.28	1.76803	33.24	1.50421	38.86	1.28667	32.63	1.53233	15
2017	Cpto M Budapest	50	F	IM	200	855	Rusia	25	2:12.88	28.43	1.75871	34.55	1.44718	35.74	1.39899	34.16	1.4637	14
2017	Cpto M Budapest	50	F	IM	200	867	Suiza	28	2:12.25	28.4	1.76056	33.01	1.51469	39.54	1.26454	31.3	1.59744	13
2017	Cpto M Budapest	50	F	IM	200	873	Hungria	28	2:11.92	28.21	1.77242	33.44	1.49522	38.59	1.29567	31.68	1.57828	12
2017	Cpto M Budapest	50	F	IM	200	880	Canadá	22	2:11.61	29.14	1.71585	33.18	1.50693	37.89	1.31961	31.4	1.59236	11
2017	Cpto M Budapest	50	F	IM	200	887	Brasil	30	2:11.24	28.34	1.76429	33.14	1.50875	39.01	1.28172	30.75	1.62602	10
2017	Cpto M Budapest	50	F	IM	200	888	Reino Unido	27	2:11.20	29.02	1.72295	33.45	1.49477	37.56	1.3312	31.17	1.60411	9
2017	Cpto M Budapest	50	F	IM	200	903	Japón	21	2:10.45	28.11	1.77873	33.61	1.48765	37.15	1.3459	31.58	1.58328	8
2017	Cpto M Budapest	50	F	IM	200	904	Reino Unido	21	2:10.41	27.56	1.81422	33.04	1.51332	38.2	1.3089	31.61	1.58178	7
2017	Cpto M Budapest	50	F	IM	200	904	Corea del Sur	23	2:10.40	27.94	1.78955	32.53	1.53704	38.9	1.28535	31.03	1.61134	6
2017	Cpto M Budapest	50	F	IM	200	913	Japón	16	2:09.99	27.84	1.79598	33.77	1.4806	37.62	1.32908	30.76	1.62549	5
2017	Cpto M Budapest	50	F	IM	200	916	USA	25	2:09.82	27.81	1.79791	32.78	1.52532	37.41	1.33654	31.82	1.57134	4
2017	Cpto M Budapest	50	F	IM	200	919	USA	22	2:09.71	27.92	1.79083	33.88	1.4758	37.46	1.33476	30.45	1.64204	3
2017	Cpto M Budapest	50	F	IM	200	958	Japón	21	2:07.91	27.67	1.80701	32.62	1.5328	37.34	1.33905	30.28	1.65125	2
2017	Cpto M Budapest	50	F	IM	200	979	Hungria	28	2:07.00	27.07	1.84706	31.99	1.56299	37.33	1.33941	30.61	1.63345	1
2017	Cpto M Budapest	50	F	IM	400	800	Canadá	17	4:46.88	64.45	0.775795	73	0.684932	83.09	0.601757	66.34	0.753693	19
2017	Cpto M Budapest	50	F	IM	400	801	República Checa	24	4:46.75	64.04	0.780762	72.67	0.688042	83.47	0.599018	65.57	0.762544	18
2017	Cpto M Budapest	50	F	IM	400	816	Portugal	21	4:44.96	63	0.793651	71.71	0.697253	80.27	0.622898	69.98	0.71449	17
2017	Cpto M Budapest	50	F	IM	400	828	Australia	16	4:43.61	65.2	0.766871	70.61	0.708115	81.84	0.610948	65.96	0.758035	16
2017	Cpto M Budapest	50	F	IM	400	830	China	21	4:43.40	62.88	0.795165	73.63	0.679071	81.77	0.611471	65.12	0.767813	15
2017	Cpto M Budapest	50	F	IM	400	840	Turquia	19	4:42.27	64.01	0.781128	74.51	0.671051	77.85	0.642261	65.9	0.758725	14
2017	Cpto M Budapest	50	F	IM	400	840	China	19	4:42.26	63.63	0.785793	72.48	0.689845	80.13	0.623986	66.02	0.757346	13
2017	Cpto M Budapest	50	F	IM	400	848	Hungria	28	4:41.40	63.36	0.789141	71.05	0.70373	80.99	0.61736	66	0.757576	12
2017	Cpto M Budapest	50	F	IM	400	849	Brasil	30	4:41.29	62.42	0.801025	71.59	0.698422	83.36	0.599808	63.92	0.782228	11
2017	Cpto M Budapest	50	F	IM	400	857	Vietnam	20	4:40.39	63	0.793651	71.29	0.701361	81.12	0.616371	64.98	0.769468	10
2017	Cpto M Budapest	50	F	IM	400	862	Corea del Sur	23	4:39.80	63.04	0.793147	70.23	0.711946	80.54	0.62081	65.99	0.757691	9
2017	Cpto M Budapest	50	F	IM	400	876	Reino Unido	27	4:38.34	62.97	0.794029	71.57	0.698617	79.09	0.632191	64.71	0.772678	8
2017	Cpto M Budapest	50	F	IM	400	883	USA	24	4:37.63	63.86	0.782963	69.84	0.715922	80.03	0.624766	63.9	0.782473	7
2017	Cpto M Budapest	50	F	IM	400	897	USA	22	4:36.09	62.9	0.794913	71.32	0.701066	81.23	0.615536	60.64	0.824538	6
2017	Cpto M Budapest	50	F	IM	400	902	Japón	25	4:35.62	62.32	0.802311	70.98	0.704424	78.14	0.639877	64.18	0.779059	5
2017	Cpto M Budapest	50	F	IM	400	913	Japón	21	4:34.50	62.24	0.803342	69.2	0.722543	79.46	0.629247	63.6	0.786164	4
2017	Cpto M Budapest	50	F	IM	400	930	Canadá	20	4:32.88	63.76	0.784191	70.3	0.711238	76.17	0.656426	62.65	0.798085	3
2017	Cpto M Budapest	50	F	IM	400	937	España	26	4:32.17	62.14	0.804635	70.63	0.707914	78.49	0.637024	60.91	0.820883	2
2017	Cpto M Budapest	50	F	IM	400	967	Hungria	28	4:29.33	61.16	0.817528	67.58	0.739864	78.27	0.638814	62.32	0.802311	1
2017	Cpto M Budapest	50	M	IM	200	800	España	18	2:02.78	26.18	1.90985	30.15	1.65837	35.69	1.40095	30.76	1.62549	25
2017	Cpto M Budapest	50	M	IM	200	816	Polonia	23	2:01.96	26.94	1.85598	32.22	1.55183	34.07	1.46757	28.73	1.74034	24
2017	Cpto M Budapest	50	M	IM	200	820	Eslovaquia	24	2:01.78	26.5	1.88679	31.76	1.57431	34.96	1.43021	28.56	1.7507	23
2017	Cpto M Budapest	50	M	IM	200	823	Luxemburgo	25	2:01.60	25.69	1.94628	30.71	1.62813	35.58	1.40528	29.62	1.68805	22
2017	Cpto M Budapest	50	M	IM	200	825	Hungria	18	2:01.54	26.28	1.90259	30.51	1.63881	35.37	1.41363	29.38	1.70184	21
2017	Cpto M Budapest	50	M	IM	200	829	Dinamarca	24	2:01.34	25.6	1.95312	30.86	1.62022	35.15	1.42248	29.73	1.6818	20
2017	Cpto M Budapest	50	M	IM	200	831	Ecuador	21	2:01.21	26.05	1.91939	30.54	1.6372	35.29	1.41683	29.33	1.70474	19
2017	Cpto M Budapest	50	M	IM	200	840	Rusia	21	2:00.81	25.11	1.99124	32	1.5625	33.71	1.48324	29.99	1.66722	18
2017	Cpto M Budapest	50	M	IM	200	842	Egipto	25	2:00.68	26.12	1.91424	30.77	1.62496	34.5	1.44928	29.29	1.70707	17
2017	Cpto M Budapest	50	M	IM	200	857	Israel	25	1:59.98	25.42	1.96696	29.72	1.68237	35.25	1.41844	29.59	1.68976	16
2017	Cpto M Budapest	50	M	IM	200	861	Australia	19	1:59.80	25.35	1.97239	29.98	1.66778	35.29	1.41683	29.18	1.7135	15
2017	Cpto M Budapest	50	M	IM	200	866	Italia	30	1:59.56	26.13	1.91351	30.44	1.64258	34.78	1.43761	28.21	1.77242	14
2017	Cpto M Budapest	50	M	IM	200	873	Neozelanda	21	1:59.24	25.82	1.93648	30.61	1.63345	33.99	1.47102	28.82	1.73491	13
2017	Cpto M Budapest	50	M	IM	200	874	Portugal	25	1:59.22	25.61	1.95236	30.06	1.66334	34.87	1.4339	28.68	1.74338	12
2017	Cpto M Budapest	50	M	IM	200	883	Reino Unido	21	1:58.80	25.59	1.95389	30.27	1.6518	34.26	1.45943	28.68	1.74338	11
2017	Cpto M Budapest	50	M	IM	200	901	USA	20	1:58.01	25.47	1.96309	30.62	1.63292	33.85	1.4771	28.07	1.78126	10
2017	Cpto M Budapest	50	M	IM	200	902	Grecia	23	1:57.98	25.83	1.93573	28.84	1.7337	34.41	1.45307	28.9	1.7301	9
2017	Cpto M Budapest	50	M	IM	200	913	Suiza	22	1:57.50	25.6	1.95312	29.37	1.70242	34.29	1.45815	28.24	1.77054	8
2017	Cpto M Budapest	50	M	IM	200	914	Alemania	26	1:57.43	25.56	1.95618	29.96	1.66889	33.27	1.50286	28.64	1.74581	7
2017	Cpto M Budapest	50	M	IM	200	923	China	18	1:57.06	25.21	1.98334	30.58	1.63506	33.14	1.50875	28.13	1.77746	6
2017	Cpto M Budapest	50	M	IM	200	925	Japón	23	1:56.97	25.14	1.98886	29.4	1.70068	33.61	1.48765	28.82	1.73491	5
2017	Cpto M Budapest	50	M	IM	200	928	Reino Unido	22	1:56.86	25.6	1.95312	28.76	1.73853	34.4	1.45349	28.1	1.77936	4
2017	Cpto M Budapest	50	M	IM	200	942	China	23	1:56.28	24.92	2.00642	29.65	1.68634	33.82	1.47842	27.89	1.79276	3
2017	Cpto M Budapest	50	M	IM	200	948	Japón	22	1:56.01	24.62	2.03087	29.14	1.71585	34.07	1.46757	28.18	1.77431	2
2017	Cpto M Budapest	50	M	IM	200	960	USA	23	1:55.56	25.27	1.97863	29.19	1.71292	32.63	1.53233	28.47	1.75623	1
2017	Cpto M Budapest	50	M	IM	400	800	Israel	21	4:22.66	58.11	0.860437	69	0.724638	73.43	0.680921	62.12	0.804894	27
2017	Cpto M Budapest	50	M	IM	400	802	Liechestein	24	4:22.29	58.77	0.850774	70.89	0.705318	71.49	0.699399	61.14	0.817795	26
2017	Cpto M Budapest	50	M	IM	400	805	República Checa	23	4:22.11	59.47	0.84076	66.93	0.747049	76.33	0.65505	59.38	0.842034	25
2017	Cpto M Budapest	50	M	IM	400	817	Dinamarca	22	4:20.74	59.84	0.835561	77.8	0.642674	73.02	0.684744	60.08	0.832224	24
2017	Cpto M Budapest	50	M	IM	400	818	Neozelanda	21	4:20.65	59.59	0.839067	65.55	0.762777	73.96	0.676041	61.55	0.812348	23
2017	Cpto M Budapest	50	M	IM	400	820	Polonia	23	4:20.48	59.74	0.83696	67.77	0.73779	71.64	0.697934	61.33	0.815262	22
2017	Cpto M Budapest	50	M	IM	400	821	Australia	19	4:20.34	58.45	0.855432	65	0.769231	75.54	0.661901	61.35	0.814996	21
2017	Cpto M Budapest	50	M	IM	400	823	Sudáfrica	24	4:20.10	58.54	0.854117	66.47	0.752219	72.39	0.690703	62.7	0.797448	20
2017	Cpto M Budapest	50	M	IM	400	824	China	23	4:20.01	57.74	0.865951	65.3	0.765697	76.41	0.654365	60.56	0.825627	19
2017	Cpto M Budapest	50	M	IM	400	825	Hungria	25	4:19.90	58.25	0.858369	66.6	0.750751	74.11	0.674673	60.94	0.820479	18
2017	Cpto M Budapest	50	M	IM	400	826	Canadá	21	4:19.87	58.92	0.848608	66.5	0.75188	73.87	0.676865	60.58	0.825355	17
2017	Cpto M Budapest	50	M	IM	400	833	Austria	21	4:19.15	58.44	0.855578	65.82	0.759648	74.09	0.674855	60.8	0.822368	16
2017	Cpto M Budapest	50	M	IM	400	837	Suiza	22	4:18.69	59.11	0.845881	65.02	0.768994	73.53	0.679995	61.03	0.819269	15
2017	Cpto M Budapest	50	M	IM	400	841	Italia	30	4:18.25	58.86	0.849473	64.2	0.778816	75.49	0.662339	59.7	0.837521	14
2017	Cpto M Budapest	50	M	IM	400	847	Alemania	22	4:17.68	58.57	0.853679	66.57	0.751089	73.07	0.684275	59.47	0.84076	13
2017	Cpto M Budapest	50	M	IM	400	850	Ecuador	21	4:17.37	58.81	0.850196	66.64	0.7503	72.43	0.690322	59.49	0.840477	12
2017	Cpto M Budapest	50	M	IM	400	850	Portugal	25	4:17.34	58.62	0.852951	66.77	0.748839	72.65	0.688231	59.3	0.84317	11
2017	Cpto M Budapest	50	M	IM	400	861	España	20	4:16.27	57.52	0.869263	65.65	0.761615	72.9	0.685871	60.2	0.830565	10
2017	Cpto M Budapest	50	M	IM	400	867	Reino Unido	21	4:15.71	57.82	0.864753	64.41	0.776277	72.52	0.689465	60.96	0.82021	9
2017	Cpto M Budapest	50	M	IM	400	860	Eslovaquia	24	4:16.33	57.62	0.867754	66.34	0.753693	73.35	0.681663	59.02	0.84717	8
2017	Cpto M Budapest	50	M	IM	400	895	Brasil	20	4:13.00	57.49	0.869716	63.31	0.789765	73.73	0.67815	58.47	0.855139	7
2017	Cpto M Budapest	50	M	IM	400	898	Japón	22	4:12.65	56.19	0.889838	64.28	0.777847	72.09	0.693577	60.09	0.832085	6
2017	Cpto M Budapest	50	M	IM	400	905	USA	21	4:12.05	57.03	0.876732	64.38	0.776639	73.51	0.68018	57.13	0.875197	5
2017	Cpto M Budapest	50	M	IM	400	932	Reino Unido	22	4:09.62	56.33	0.887626	63.33	0.789515	71.24	0.701853	58.72	0.851499	4
2017	Cpto M Budapest	50	M	IM	400	937	Japón	23	4:09.14	56.07	0.891742	64.48	0.775434	70.3	0.711238	58.29	0.85778	3
2017	Cpto M Budapest	50	M	IM	400	946	Hungria	28	4:08.38	56.77	0.880747	63.61	0.78604	69.04	0.724218	58.96	0.848033	2
2017	Cpto M Budapest	50	M	IM	400	975	USA	23	4:05.90	55.93	0.893975	63.65	0.785546	69.67	0.717669	58.65	0.852515	1
2018	Cpto M Hangzhou	25	F	IM	200	805	Alemania	23	2:10.97	28.75	1.73913	33.42	1.49611	38.26	1.30685	30.54	1.6372	15
2018	Cpto M Hangzhou	25	F	IM	200	809	República Checa	25	2:10.78	28.37	1.76243	33.19	1.50648	37.58	1.33049	31.64	1.58028	14
2018	Cpto M Hangzhou	25	F	IM	200	816	República Checa	21	2:10.36	28.72	1.74095	33.46	1.49432	37.15	1.3459	31.05	1.61031	13
2018	Cpto M Hangzhou	25	F	IM	200	827	España	23	2:09.82	28.48	1.75562	32.28	1.54895	37.9	1.31926	31.16	1.60462	12
2018	Cpto M Hangzhou	25	F	IM	200	839	China	20	2:09.17	28.03	1.7838	32.12	1.55666	38.11	1.31199	30.91	1.6176	11
2018	Cpto M Hangzhou	25	F	IM	200	857	Francia	24	2:08.27	28.34	1.76429	32.39	1.54369	36.85	1.35685	30.69	1.6292	10
2018	Cpto M Hangzhou	25	F	IM	200	864	Japón	21	2:07.94	27.26	1.83419	32.32	1.54703	37.57	1.33085	30.79	1.6239	9
2018	Cpto M Hangzhou	25	F	IM	200	854	Japón	26	2:08.41	28.08	1.78063	32.67	1.53046	36.84	1.35722	30.82	1.62232	8
2018	Cpto M Hangzhou	25	F	IM	200	856	Australia	20	2:08.30	28.16	1.77557	32.67	1.53046	36.68	1.36314	30.79	1.6239	7
2018	Cpto M Hangzhou	25	F	IM	200	887	Australia	26	2:06.80	27.26	1.83419	30.78	1.62443	37.96	1.31718	30.8	1.62338	6
2018	Cpto M Hangzhou	25	F	IM	200	900	Italia	19	2:06.17	27.35	1.82815	31.58	1.58328	36.32	1.37665	30.92	1.61708	5
2018	Cpto M Hangzhou	25	F	IM	200	909	China	22	2:05.79	27.54	1.81554	31.66	1.57928	36.64	1.36463	29.95	1.66945	4
2018	Cpto M Hangzhou	25	F	IM	200	914	USA	21	2:05.54	27.02	1.85048	30.77	1.62496	36.39	1.374	31.36	1.59439	3
2018	Cpto M Hangzhou	25	F	IM	200	935	USA	26	2:04.62	27.53	1.8162	31.61	1.58178	35.68	1.40135	29.8	1.67785	2
2018	Cpto M Hangzhou	25	F	IM	200	966	Hungria	29	2:03.25	26.74	1.86986	31.4	1.59236	35.21	1.42005	29.9	1.67224	1
2018	Cpto M Hangzhou	25	F	IM	400	803	Portugal	23	4:38.49	63.64	0.785669	71.68	0.697545	77.02	0.649182	66.15	0.755858	17
2018	Cpto M Hangzhou	25	F	IM	400	812	Rusia	18	4:37.54	61.04	0.819135	70.75	0.706714	81.53	0.613271	64.22	0.778574	16
2018	Cpto M Hangzhou	25	F	IM	400	813	España	21	4:37.42	64.36	0.77688	69.85	0.71582	81.54	0.613196	61.67	0.810767	15
2018	Cpto M Hangzhou	25	F	IM	400	813	República Checa	25	4:37.33	62.81	0.796052	69.23	0.72223	80.64	0.62004	64.65	0.773395	14
2018	Cpto M Hangzhou	25	F	IM	400	814	Vietnam	22	4:37.28	63.19	0.791264	70.22	0.712048	80.07	0.624454	63.8	0.783699	13
2018	Cpto M Hangzhou	25	F	IM	400	819	Argentina	26	4:36.68	63.38	0.788892	69.23	0.72223	80.23	0.623208	63.84	0.783208	12
2018	Cpto M Hangzhou	25	F	IM	400	831	China	20	4:35.34	60.93	0.820614	67.72	0.738334	80.4	0.621891	66.29	0.754262	11
2018	Cpto M Hangzhou	25	F	IM	400	835	USA	23	4:34.93	62.81	0.796052	71.17	0.702543	79.76	0.626881	61.19	0.817127	10
2018	Cpto M Hangzhou	25	F	IM	400	851	Australia	20	4:33.23	61.72	0.81011	69.62	0.718184	76.86	0.650533	65.03	0.768876	9
2018	Cpto M Hangzhou	25	F	IM	400	829	Japón	26	4:35.62	63.63	0.785793	70.52	0.709019	75.7	0.660502	65.77	0.760225	8
2018	Cpto M Hangzhou	25	F	IM	400	866	España	23	4:31.63	61.28	0.815927	67.9	0.736377	78.8	0.634518	63.65	0.785546	7
2018	Cpto M Hangzhou	25	F	IM	400	871	Japón	26	4:31.07	61.77	0.809454	69.33	0.721189	69.26	0.721917	62.71	0.797321	6
2018	Cpto M Hangzhou	25	F	IM	400	886	Francia	27	4:29.56	61.93	0.807363	69.99	0.714388	74.22	0.673673	63.42	0.788395	5
2018	Cpto M Hangzhou	25	F	IM	400	903	Italia	19	4:27.88	61.1	0.818331	67.89	0.736485	76.64	0.652401	62.25	0.803213	4
2018	Cpto M Hangzhou	25	F	IM	400	908	Francia	24	4:27.31	61.97	0.806842	67.27	0.743273	75.59	0.661463	62.48	0.800256	3
2018	Cpto M Hangzhou	25	F	IM	400	924	USA	26	4:25.84	62	0.806452	69.57	0.718701	74.34	0.672585	59.63	0.838504	2
2018	Cpto M Hangzhou	25	F	IM	400	972	Hungria	29	4:21.40	59.59	0.839067	66.11	0.756315	74.8	0.668449	60.9	0.821018	1
2018	Cpto M Hangzhou	25	M	IM	200	805	Hungria	24	1:57.84	25.21	1.98334	30.13	1.65948	34.49	1.4497	28.01	1.78508	25
2018	Cpto M Hangzhou	25	M	IM	200	818	Hong Kong	26	1:57.19	23.71	2.10881	29.06	1.72058	34.23	1.46071	30.19	1.65618	24
2018	Cpto M Hangzhou	25	M	IM	200	824	España	26	1:56.90	25.28	1.97785	29.1	1.71821	33.92	1.47406	28.6	1.74825	23
2018	Cpto M Hangzhou	25	M	IM	200	832	Luxemburgo	26	1:56.56	25.62	1.9516	29.74	1.68124	33.44	1.49522	27.76	1.80115	22
2018	Cpto M Hangzhou	25	M	IM	200	833	Australia	19	1:56.48	25.43	1.96618	29.86	1.67448	33.14	1.50875	28.05	1.78253	21
2018	Cpto M Hangzhou	25	M	IM	200	839	Italia	17	1:56.20	25.04	1.99681	28.65	1.7452	34.33	1.45645	28.18	1.77431	20
2018	Cpto M Hangzhou	25	M	IM	200	841	Japón	24	1:56.11	25.27	1.97863	28.46	1.75685	33.3	1.5015	29.08	1.71939	19
2018	Cpto M Hangzhou	25	M	IM	200	847	España	19	1:55.84	25.17	1.98649	29.29	1.70707	33.59	1.48854	27.79	1.79921	18
2018	Cpto M Hangzhou	25	M	IM	200	859	Ecuador	22	1:55.32	25.25	1.9802	29.6	1.68919	32.64	1.53186	27.83	1.79662	17
2018	Cpto M Hangzhou	25	M	IM	200	860	Reino Unido	23	1:55.25	24.71	2.02347	28.75	1.73913	33.16	1.50784	28.63	1.74642	16
2018	Cpto M Hangzhou	25	M	IM	200	862	Rusia	23	1:55.19	24.89	2.00884	28.89	1.7307	33.4	1.49701	28.01	1.78508	15
2018	Cpto M Hangzhou	25	M	IM	200	868	USA	22	1:54.92	24.69	2.02511	29.31	1.7059	33.18	1.50693	27.74	1.80245	14
2018	Cpto M Hangzhou	25	M	IM	200	872	Portugal	26	1:54.71	25.23	1.98177	28.99	1.72473	33.11	1.51012	27.38	1.82615	13
2018	Cpto M Hangzhou	25	M	IM	200	879	Suecia	32	1:54.41	25.14	1.98886	28.99	1.72473	32.32	1.54703	27.96	1.78827	12
2018	Cpto M Hangzhou	25	M	IM	200	881	Noruega	18	1:54.34	24.59	2.03335	28.34	1.76429	33.63	1.48677	27.78	1.79986	11
2018	Cpto M Hangzhou	25	M	IM	200	881	Portugal	30	1:54.34	24.78	2.01776	28.61	1.74764	32.6	1.53374	28.35	1.76367	10
2018	Cpto M Hangzhou	25	M	IM	200	886	Neozelanda	23	1:54.13	24.98	2.0016	28.67	1.74398	32.78	1.52532	27.7	1.80505	9
2018	Cpto M Hangzhou	25	M	IM	200	889	Neozelanda	23	1:54.01	24.85	2.01207	28.6	1.74825	32.5	1.53846	28.06	1.7819	8
2018	Cpto M Hangzhou	25	M	IM	200	890	Polonia	24	1:53.96	24.9	2.00803	28.44	1.75809	33.22	1.50512	27.4	1.82482	7
2018	Cpto M Hangzhou	25	M	IM	200	904	Brasil	23	1:53.38	24.61	2.03169	28.15	1.7762	33.4	1.49701	27.22	1.83688	6
2018	Cpto M Hangzhou	25	M	IM	200	911	Brasil	19	1:53.05	24.66	2.02758	28.55	1.75131	32.37	1.54464	27.47	1.82017	5
2018	Cpto M Hangzhou	25	M	IM	200	918	Australia	25	1:52.78	24.91	2.00723	28.05	1.78253	32.85	1.52207	26.97	1.85391	4
2018	Cpto M Hangzhou	25	M	IM	200	919	Japón	27	1:52.73	24.53	2.03832	27.98	1.78699	32.24	1.55087	27.98	1.78699	3
2018	Cpto M Hangzhou	25	M	IM	200	920	USA	25	1:52.69	24.35	2.05339	28.7	1.74216	32.02	1.56152	27.62	1.81028	2
2018	Cpto M Hangzhou	25	M	IM	200	963	China	24	1:51.01	23.79	2.10172	27.77	0.900252	32.11	1.55715	27.34	1.82882	1
2018	Cpto M Hangzhou	25	M	IM	400	804	Sudáfrica	25	4:13.21	57.79	0.865202	65.65	0.761615	70.19	0.712352	59.58	0.839208	22
2018	Cpto M Hangzhou	25	M	IM	400	810	Noruega	18	4:12.56	53.46	0.935279	63.12	0.792142	71.74	0.696961	64.26	0.778089	21
2018	Cpto M Hangzhou	25	M	IM	400	819	China	20	4:11.64	56.23	0.889205	63.35	0.789266	72.49	0.68975	59.57	0.839349	20
2018	Cpto M Hangzhou	25	M	IM	400	823	Taipei	19	4:11.22	56.48	0.885269	66.55	0.751315	71.02	0.704027	57.17	0.874585	19
2018	Cpto M Hangzhou	25	M	IM	400	825	Austria	22	4:11.05	57.49	0.869716	62.36	0.801796	70.95	0.704722	60.25	0.829876	18
2018	Cpto M Hangzhou	25	M	IM	400	831	Puerto Rico	17	4:10.40	57.23	0.873668	63.96	0.781739	70.65	0.707714	58.56	0.853825	17
2018	Cpto M Hangzhou	25	M	IM	400	844	Rusia	24	4:09.19	56.69	0.88199	63.64	0.785669	69.28	0.721709	59.58	0.839208	16
2018	Cpto M Hangzhou	25	M	IM	400	846	Brasil	23	4:08.93	56.82	0.879972	63.37	0.789017	72.4	0.690608	56.34	0.887469	15
2018	Cpto M Hangzhou	25	M	IM	400	847	Reino Unido	23	4:08.86	56.61	0.883236	63.58	0.786411	70.18	0.712454	58.49	0.854847	14
2018	Cpto M Hangzhou	25	M	IM	400	850	USA	18	4:08.52	57.29	0.872753	62.77	0.796559	71.69	0.697447	56.77	0.880747	13
2018	Cpto M Hangzhou	25	M	IM	400	851	España	26	4:08.51	55.88	0.894775	63.35	0.789266	70.94	0.704821	58.34	0.857045	12
2018	Cpto M Hangzhou	25	M	IM	400	852	Australia	19	4:08.41	57.13	0.875197	63.29	0.790014	69.9	0.715308	58.09	0.860733	11
2018	Cpto M Hangzhou	25	M	IM	400	852	España	22	4:08.33	56.76	0.880902	63.9	0.782473	69.34	0.721085	58.33	0.857192	10
2018	Cpto M Hangzhou	25	M	IM	400	857	Eslovaquia	25	4:07.91	56.49	0.885112	64.26	0.778089	70.33	0.710934	56.83	0.879817	9
2018	Cpto M Hangzhou	25	M	IM	400	859	Portugal	20	4:07.69	56.57	0.883861	61.7	0.810373	71.14	0.702839	58.28	0.857927	8
2018	Cpto M Hangzhou	25	M	IM	400	866	Japón	20	4:06.99	56.87	0.879198	63.47	0.787774	69.11	0.723484	57.54	0.868961	7
2018	Cpto M Hangzhou	25	M	IM	400	874	Ecuador	22	4:06.26	57.02	0.876885	62.95	0.794281	68.66	0.728226	57.63	0.867604	6
2018	Cpto M Hangzhou	25	M	IM	400	890	Hungria	27	4:04.74	56.06	0.891902	61.12	0.818063	69.79	0.716435	57.77	0.865501	5
2018	Cpto M Hangzhou	25	M	IM	400	891	Hungria	26	4:04.71	54.8	0.912409	59.95	0.834028	72.51	0.68956	57.45	0.870322	4
2018	Cpto M Hangzhou	25	M	IM	400	902	Brasil	21	4:03.71	55.84	0.895415	60.2	0.830565	69.47	0.719735	58.2	0.859107	3
2018	Cpto M Hangzhou	25	M	IM	400	913	Australia	27	4:02.74	54.94	0.910084	61.26	0.816193	70.25	0.711744	56.29	0.888257	2
2018	Cpto M Hangzhou	25	M	IM	400	988	Japón	24	3:56.43	53.21	0.939673	59.6	0.838926	66.88	0.747608	56.74	0.881213	1
2019	Cpto M Gwangju	50	F	IM	200	816	España	28	2:14.93	29.05	1.72117	36.49	1.37024	38.43	1.30107	30.96	1.61499	20
2019	Cpto M Gwangju	50	F	IM	200	821	Rusia	27	2:14.65	28.14	1.77683	33.83	1.47798	40.75	1.22699	31.93	1.56593	19
2019	Cpto M Gwangju	50	F	IM	200	834	Portugal	23	2:13.97	29.26	1.70882	34.49	1.4497	37.51	1.33298	32.71	1.52858	18
2019	Cpto M Gwangju	50	F	IM	200	835	Reino Unido	26	2:13.90	29.3	1.70648	34.2	1.46199	38.47	1.29971	31.93	1.56593	17
2019	Cpto M Gwangju	50	F	IM	200	847	Hungria	30	2:13.29	28.57	1.75009	33.72	1.4828	39.07	1.27975	31.93	1.56593	16
2019	Cpto M Gwangju	50	F	IM	200	835	Israel	15	2:13.90	28.29	1.76741	34.7	1.44092	38.9	1.28535	32.01	1.56201	15
2019	Cpto M Gwangju	50	F	IM	200	853	Canadá	20	2:12.96	28.38	1.7618	34.78	1.43761	37.75	1.3245	32.05	1.56006	14
2019	Cpto M Gwangju	50	F	IM	200	864	Turquia	21	2:12.40	28.52	1.75316	34.39	1.45391	37.26	1.34192	32.23	1.55135	13
2019	Cpto M Gwangju	50	F	IM	200	868	Francia	24	2:12.18	28.13	1.77746	33.8	1.47929	38.36	1.30344	31.89	1.56789	12
2019	Cpto M Gwangju	50	F	IM	200	869	Italia	19	2:12.12	28.46	1.75685	33.61	1.48765	38.32	1.3048	31.73	1.5758	11
2019	Cpto M Gwangju	50	F	IM	200	880	China	13	2:11.60	27.77	1.8005	34.49	1.4497	38.25	1.30719	31.09	1.60823	10
2019	Cpto M Gwangju	50	F	IM	200	898	Suiza	30	2:10.72	28.24	1.77054	32.98	1.51607	38.27	1.30651	31.23	1.60102	9
2019	Cpto M Gwangju	50	F	IM	200	898	USA	22	2:10.72	28.81	1.73551	32.74	1.52718	38.18	1.30959	30.99	1.61342	8
2019	Cpto M Gwangju	50	F	IM	200	904	Reino Unido	23	2:10.43	27.65	1.80832	33.14	1.50875	37.86	1.32066	31.78	1.57332	7
2019	Cpto M Gwangju	50	F	IM	200	910	Corea del Sur	25	2:10.12	27.67	1.80701	32.72	1.52812	38.47	1.29971	31.26	1.59949	6
2019	Cpto M Gwangju	50	F	IM	200	927	Japón	22	2:09.32	27.52	1.81686	32.78	1.52532	37.99	1.31614	31.03	1.61134	5
2019	Cpto M Gwangju	50	F	IM	200	936	USA	27	2:08.91	28.3	1.76678	33.03	1.51378	37.13	1.34662	30.45	1.64204	4
2019	Cpto M Gwangju	50	F	IM	200	941	Canadá	22	2:08.70	27.92	1.79083	32.66	1.53092	37.32	1.33976	30.8	1.62338	3
2019	Cpto M Gwangju	50	F	IM	200	943	China	23	2:08.60	28.4	1.76056	32.95	1.51745	36.97	1.35245	30.28	1.65125	2
2019	Cpto M Gwangju	50	F	IM	200	967	Hungria	30	2:07.53	27.78	1.79986	32.6	1.53374	36.56	1.36761	30.59	1.63452	1
2019	Cpto M Gwangju	50	F	IM	400	807	Turquia	21	4:46.01	64.34	0.777122	75.68	0.660677	78.27	0.638814	67.72	0.738334	17
2019	Cpto M Gwangju	50	F	IM	400	831	Italia	19	4:43.27	63.07	0.79277	71.96	0.69483	82.21	0.608199	66.03	0.757232	16
2019	Cpto M Gwangju	50	F	IM	400	833	Portugal	23	4:43.03	63.96	0.781739	72.64	0.688326	78.07	0.640451	68.36	0.731422	15
2019	Cpto M Gwangju	50	F	IM	400	838	China	13	4:42.52	63.42	0.788395	72.65	0.688231	80.35	0.622278	66.1	0.75643	14
2019	Cpto M Gwangju	50	F	IM	400	841	España	28	4:42.16	64.18	0.779059	74.06	0.675128	81.31	0.614931	62.61	0.798594	13
2019	Cpto M Gwangju	50	F	IM	400	846	Serbia	19	4:41.59	63.21	0.791014	71.35	0.700771	81.06	0.616827	65.97	0.75792	12
2019	Cpto M Gwangju	50	F	IM	400	849	Reino Unido	26	4:41.24	63.25	0.790514	71.76	0.696767	80.27	0.622898	65.96	0.758035	11
2019	Cpto M Gwangju	50	F	IM	400	855	Corea del Sur	25	4:40.55	62.75	0.796813	71.64	0.697934	81.25	0.615385	64.91	0.770297	10
2019	Cpto M Gwangju	50	F	IM	400	863	USA	20	4:39.74	62.72	0.797194	72.97	0.685213	79.93	0.625547	64.12	0.779788	9
2019	Cpto M Gwangju	50	F	IM	400	863	Francia	24	4:39.68	63.21	0.791014	72.09	0.693577	79.74	0.627038	64.64	0.773515	8
2019	Cpto M Gwangju	50	F	IM	400	868	Hungria	30	4:39.15	62.75	0.796813	71.04	0.703829	82.54	0.605767	63.78	0.783945	7
2019	Cpto M Gwangju	50	F	IM	400	876	USA	22	4:38.34	64.26	0.778089	72.56	0.689085	79.22	0.631154	62.3	0.802568	6
2019	Cpto M Gwangju	50	F	IM	400	885	Canadá	21	4:37.42	61.53	0.812612	71.01	0.704126	82.4	0.606796	62.48	0.800256	5
2019	Cpto M Gwangju	50	F	IM	400	891	Canadá	22	4:36.72	63.53	0.78703	70.9	0.705219	77.39	0.646078	64.9	0.770416	4
2019	Cpto M Gwangju	50	F	IM	400	935	Japón	23	4:32.33	61.29	0.815794	69.24	0.722126	78.49	0.637024	63.31	0.789765	3
2019	Cpto M Gwangju	50	F	IM	400	938	China	23	4:32.07	62.87	0.795292	70.23	0.711946	76.97	0.649604	62	0.806452	2
2019	Cpto M Gwangju	50	F	IM	400	955	Hungria	30	4:30.39	61.33	0.815262	69.11	0.723484	77.18	0.647836	62.77	0.796559	1
2019	Cpto M Gwangju	50	M	IM	200	802	Liechestein	26	2:02.68	26.15	1.91205	32.54	1.53657	34.29	1.45815	29.7	1.6835	33
2019	Cpto M Gwangju	50	M	IM	200	804	Egipto	22	2:02.57	25.67	1.9478	30.59	1.63452	37.21	1.34372	29.1	1.71821	32
2019	Cpto M Gwangju	50	M	IM	200	804	Hungria	27	2:02.56	26.03	1.92086	30.19	1.65618	36.28	1.37817	30.06	1.66334	31
2019	Cpto M Gwangju	50	M	IM	200	805	Lituania	22	2:02.50	26.17	1.91058	32.84	1.52253	33.97	1.47189	29.52	1.69377	30
2019	Cpto M Gwangju	50	M	IM	200	808	Corea del Sur	18	2:02.36	25.27	1.97863	31.3	1.59744	36.22	1.38045	29.57	1.6909	29
2019	Cpto M Gwangju	50	M	IM	200	813	Polonia	25	2:02.14	26.76	1.86846	32.5	1.53846	34.34	1.45603	28.54	1.75193	28
2019	Cpto M Gwangju	50	M	IM	200	820	Argelia	19	2;01.76	25.47	1.96309	31.1	1.60772	35.53	1.40726	29.66	1.68577	27
2019	Cpto M Gwangju	50	M	IM	200	821	Turquia	24	2:01.72	26.01	1.92234	29.76	1.68011	35.57	1.40568	30.38	1.64582	26
2019	Cpto M Gwangju	50	M	IM	200	825	Taipei	20	2:01.54	25.56	1.95618	31.82	1.57134	35.42	1.41163	28.74	1.73974	25
2019	Cpto M Gwangju	50	M	IM	200	825	Puerto Rico	18	2:01.54	26.36	1.89681	30.89	1.61865	34.52	1.44844	29.77	1.67954	24
2019	Cpto M Gwangju	50	M	IM	200	835	Brasil	20	2:01.06	24.97	2.0024	30.32	1.64908	35.1	1.4245	30.67	1.63026	23
2019	Cpto M Gwangju	50	M	IM	200	836	Israel	27	2:00.97	25.19	1.98491	29.46	1.69722	35.6	1.40449	30.72	1.6276	22
2019	Cpto M Gwangju	50	M	IM	200	843	Suecia	32	2:00.67	25.79	1.93874	30.83	1.6218	34.67	1.44217	29.38	1.70184	21
2019	Cpto M Gwangju	50	M	IM	200	854	Holanda	24	2:00.12	25.82	1.93648	31.08	1.60875	33.78	1.48017	29.44	1.69837	20
2019	Cpto M Gwangju	50	M	IM	200	855	Ecuador	23	2:00.07	25.68	1.94704	30.4	1.64474	34.82	1.43596	29.17	1.71409	19
2019	Cpto M Gwangju	50	M	IM	200	858	Neozelanda	23	1:59.96	25.96	1.92604	30.6	1.63399	34.07	1.46757	29.33	1.70474	18
2019	Cpto M Gwangju	50	M	IM	200	861	Grecia	25	1:59.80	25.66	1.94856	29.79	1.67842	34.71	1.44051	29.64	1.68691	17
2019	Cpto M Gwangju	50	M	IM	200	851	Luxemburgo	27	2:00.26	25.76	1.94099	31.07	1.60927	34.63	1.44383	28.8	1.73611	16
2019	Cpto M Gwangju	50	M	IM	200	866	Portugal	22	1:59.56	25.66	1.94856	29.96	1.66889	34.58	1.44592	29.36	1.703	15
2019	Cpto M Gwangju	50	M	IM	200	879	Brasil	24	1:58.99	25.43	1.96618	29.78	1.67898	35.18	1.42126	28.6	1.74825	14
2019	Cpto M Gwangju	50	M	IM	200	882	Australia	27	1:58.86	25.92	1.92901	30.44	1.64258	34.25	1.45985	28.25	1.76991	13
2019	Cpto M Gwangju	50	M	IM	200	887	Portugal	27	1:58.62	25.72	1.94401	29.7	1.6835	34.54	1.4476	28.66	1.74459	12
2019	Cpto M Gwangju	50	M	IM	200	893	Reino Unido	19	1:58.34	25.41	1.96773	30.84	1.62127	33.75	1.48148	28.34	1.76429	11
2019	Cpto M Gwangju	50	M	IM	200	897	Hungria	33	1:58.17	25.38	1.97006	29.46	1.69722	34.64	1.44342	28.69	1.74277	10
2019	Cpto M Gwangju	50	M	IM	200	898	Rusia	24	1:58.16	24.89	2.00884	30.74	1.62655	34.64	1.44342	27.89	1.79276	9
2019	Cpto M Gwangju	50	M	IM	200	909	USA	22	1:57.66	25.26	1.97941	29.63	1.68748	34.5	1.44928	28.27	1.76866	8
2019	Cpto M Gwangju	50	M	IM	200	917	Australia	26	1:57.32	25.15	1.98807	29.92	1.67112	34.04	1.46886	28.21	1.77242	7
2019	Cpto M Gwangju	50	M	IM	200	925	China	25	1:56.97	25.06	1.99521	29.6	1.68919	34.14	1.46456	28.17	1.77494	6
2019	Cpto M Gwangju	50	M	IM	200	927	Reino Unido	22	1:56.91	25.53	1.95848	29.51	1.69434	34.31	1.4573	27.56	1.81422	5
2019	Cpto M Gwangju	50	M	IM	200	928	Alemania	28	1:56.86	25.47	1.96309	30.09	1.66168	33.36	1.4988	27.94	1.78955	4
2019	Cpto M Gwangju	50	M	IM	200	930	USA	25	1:56.78	25.59	1.95389	29.88	1.67336	33.25	1.50376	28.06	1.7819	3
2019	Cpto M Gwangju	50	M	IM	200	935	Suiza	24	1:56.56	24.85	2.01207	29.47	1.69664	33.38	1.4979	28.86	1.7325	2
2019	Cpto M Gwangju	50	M	IM	200	945	Japón	25	1:56.14	24.89	2.00884	29.3	1.70648	33.3	1.5015	28.65	1.7452	1
2019	Cpto M Gwangju	50	M	IM	400	800	Liechestein	26	4:22.56	57.73	0.866101	71.27	0.701557	71.16	0.702642	62.4	0.801282	22
2019	Cpto M Gwangju	50	M	IM	400	805	Corea del Sur	18	4:22.06	59.27	0.843597	69.84	0.715922	74.16	0.674218	60.79	0.822504	21
2019	Cpto M Gwangju	50	M	IM	400	809	Taipei	20	4:21.65	57.12	0.87535	70.17	0.712555	74.62	0.670062	59.74	0.83696	20
2019	Cpto M Gwangju	50	M	IM	400	821	Sudáfrica	26	4:20.32	58.95	0.848176	67.5	0.740741	72.18	0.692713	61.69	0.810504	19
2019	Cpto M Gwangju	50	M	IM	400	835	Puerto Rico	18	4:18.94	57.92	0.86326	66.34	0.753693	73.14	0.68362	61.54	0.81248	18
2019	Cpto M Gwangju	50	M	IM	400	845	Ecuador	23	4:17.83	58.64	0.85266	65.81	0.759763	72.06	0.693866	61.32	0.815395	17
2019	Cpto M Gwangju	50	M	IM	400	849	Polonia	25	4:17.48	58.65	0.852515	67.25	0.743494	71.88	0.695604	59.7	0.837521	16
2019	Cpto M Gwangju	50	M	IM	400	851	Canadá	23	4:17.22	59.11	0.845881	65.96	0.758035	72.13	0.693193	60.02	0.833056	15
2019	Cpto M Gwangju	50	M	IM	400	852	Portugal	21	4:17.18	58.01	0.86192	64.41	0.776277	74.08	0.674946	60.68	0.823995	14
2019	Cpto M Gwangju	50	M	IM	400	854	Hungria	30	4:16.95	57.51	0.869414	64.95	0.769823	72.84	0.686436	61.64	0.811162	13
2019	Cpto M Gwangju	50	M	IM	400	854	Australia	27	4:16.93	56.99	0.877347	65.48	0.763592	74.31	0.672857	60.15	0.831255	12
2019	Cpto M Gwangju	50	M	IM	400	864	Brasil	22	4:15.92	58.57	0.853679	63.54	0.786906	73.72	0.678242	60.09	0.832085	11
2019	Cpto M Gwangju	50	M	IM	400	868	USA	25	4:15.62	57.04	0.876578	65.35	0.765111	71.15	0.702741	62.08	0.805412	10
2019	Cpto M Gwangju	50	M	IM	400	869	Hungria	27	4:15.49	57.82	0.864753	63.67	0.785299	74.55	0.670691	59.45	0.841043	9
2019	Cpto M Gwangju	50	M	IM	400	853	Holanda	24	4:17.06	57.35	0.87184	67.6	0.739645	71.04	0.703829	61.07	0.818733	8
2019	Cpto M Gwangju	50	M	IM	400	876	Reino Unido	24	4:14.75	56.83	0.879817	64.23	0.778452	73.47	0.68055	60.22	0.830289	7
2019	Cpto M Gwangju	50	M	IM	400	883	Azerbaiyan	25	4:14.10	59.47	0.84076	67.85	0.73692	68.79	0.72685	57.99	0.862218	6
2019	Cpto M Gwangju	50	M	IM	400	886	Hungria	27	4:13.83	57.18	0.874432	64.26	0.778089	74.02	0.675493	58.37	0.856604	5
2019	Cpto M Gwangju	50	M	IM	400	892	España	22	4:13.30	57.27	0.873057	65.73	0.760688	71.84	0.695991	58.46	0.855286	4
2019	Cpto M Gwangju	50	M	IM	400	905	Neozelanda	20	4:12.07	55.83	0.895576	64.6	0.773994	72.71	0.687663	58.93	0.848464	3
2019	Cpto M Gwangju	50	M	IM	400	936	USA	23	4:09.22	56.44	0.885897	63.58	0.786411	72.21	0.692425	56.99	0.877347	2
2019	Cpto M Gwangju	50	M	IM	400	939	Japón	25	4:08.95	55.73	0.897183	63.09	0.792519	70.07	0.713572	60.06	0.832501	1
2021	JJOO Tokyo	50	F	IM	200	819	Sudáfrica	18	2:14.79	28.18	1.77431	35.29	1.41683	39.47	1.26678	31.85	1.56986	23
2021	JJOO Tokyo	50	F	IM	200	826	Turquia	23	2:14.41	28.58	1.74948	34.16	1.4637	37.84	1.32135	33.83	1.47798	22
2021	JJOO Tokyo	50	F	IM	200	830	Francia	26	2:14.20	28.52	1.75316	34.07	1.46757	39.39	1.26936	32.22	1.55183	21
2021	JJOO Tokyo	50	F	IM	200	837	España	23	2:13.81	28.62	1.74703	33.42	1.49611	40.26	1.24193	31.51	1.5868	20
2021	JJOO Tokyo	50	F	IM	200	846	Irlanda	19	2:13.34	28.62	1.74703	34.2	1.46199	38.21	1.30856	32.31	1.54751	19
2021	JJOO Tokyo	50	F	IM	200	862	Canadá	23	2:12.52	28.69	1.74277	33.77	1.4806	38.35	1.30378	31.71	1.57679	18
2021	JJOO Tokyo	50	F	IM	200	863	Hungria	24	2:12.42	28.74	1.73974	33.89	1.47536	37.99	1.31614	31.8	1.57233	17
2021	JJOO Tokyo	50	F	IM	200	855	República Checa	23	2:12.85	28.72	1.74095	34.74	1.43926	37.72	1.32556	31.67	1.57878	16
2021	JJOO Tokyo	50	F	IM	200	869	Japón	26	2:12.14	28.38	1.7618	34.14	1.46456	37.71	1.32591	31.91	1.56691	15
2021	JJOO Tokyo	50	F	IM	200	870	Italia	21	2:12.10	27.95	1.78891	33.87	1.47623	38.24	1.30753	32.04	1.56055	14
2021	JJOO Tokyo	50	F	IM	200	878	Italia	22	2:11.71	28.43	1.75871	33.43	1.49566	37.91	1.31891	31.94	1.56544	13
2021	JJOO Tokyo	50	F	IM	200	884	Corea del Sur	27	2:11.38	27.68	1.80636	32.51	1.53799	39.31	1.27194	31.88	1.56838	12
2021	JJOO Tokyo	50	F	IM	200	895	Francia	21	2:10.84	28.47	1.75623	33.59	1.48854	37.7	1.32626	31.08	1.60875	11
2021	JJOO Tokyo	50	F	IM	200	898	Israel	17	2:10.70	28.22	1.77179	33.5	1.49254	37.43	1.33583	31.55	1.58479	10
2021	JJOO Tokyo	50	F	IM	200	899	Suiza	32	2:10.65	27.83	1.79662	33.7	1.48368	38.01	1.31544	31.11	1.6072	9
2021	JJOO Tokyo	50	F	IM	200	855	Reino Unido	21	2:12.86	27.99	1.78635	33.21	1.50557	39.23	1.27453	32.43	1.54178	8
2021	JJOO Tokyo	50	F	IM	200	864	Hungria	32	2:12.38	28.5	1.75439	33.5	1.49254	39.27	0.636618	31.11	1.6072	7
2021	JJOO Tokyo	50	F	IM	200	912	Canadá	24	2:10.05	28.25	1.76991	33.46	1.49432	37.51	0.666489	30.83	1.6218	6
2021	JJOO Tokyo	50	F	IM	200	922	China	15	2:09.57	27.22	1.83688	33.2	1.50602	37.94	0.658935	31.21	1.60205	5
2021	JJOO Tokyo	50	F	IM	200	931	Reino Unido	22	2:09.15	27.72	1.80375	33.32	1.5006	36.87	0.678058	31.24	1.60051	4
2021	JJOO Tokyo	50	F	IM	200	933	USA	19	2:09.04	27.43	1.82282	33.93	1.47362	36.87	0.678058	30.81	1.62285	3
2021	JJOO Tokyo	50	F	IM	200	942	USA	19	2:08.65	27.98	1.78699	32.68	1.52999	37.04	0.674946	30.95	1.61551	2
2021	JJOO Tokyo	50	F	IM	200	945	Japón	25	2:08.52	27.99	1.78635	32.5	1.53846	37.28	0.670601	30.75	1.62602	1
2021	JJOO Tokyo	50	F	IM	400	819	Eslovenia	19	4:44.66	63.43	0.788271	73.81	0.677415	82.83	0.603646	64.59	0.774114	15
2021	JJOO Tokyo	50	F	IM	400	820	Canadá	22	4:44.54	63.39	0.788768	72.8	0.686813	81.99	0.60983	66.36	0.753466	14
2021	JJOO Tokyo	50	F	IM	400	842	Francia	26	4:41.98	63.28	0.790139	71.82	0.696185	80.7	0.619579	66.18	0.755515	13
2021	JJOO Tokyo	50	F	IM	400	844	Japón	18	4:41.76	62.72	0.797194	72.52	0.689465	81.46	0.613798	65.06	0.768521	12
2021	JJOO Tokyo	50	F	IM	400	845	China	15	4:41.64	60.94	0.820479	72.98	0.685119	81.86	0.610799	65.86	0.759186	11
2021	JJOO Tokyo	50	F	IM	400	856	Serbia	21	4:40.50	62.84	0.795672	71.7	0.69735	80.79	0.618888	65.17	0.767224	10
2021	JJOO Tokyo	50	F	IM	400	861	Italia	22	4:39.93	62.98	0.793903	70.68	0.707414	80.47	0.62135	65.8	0.759878	9
2021	JJOO Tokyo	50	F	IM	400	854	Italia	21	4:40.65	63.44	0.788146	72.97	0.685213	80.08	0.624376	64.16	0.779302	8
2021	JJOO Tokyo	50	F	IM	400	876	Reino Unido	28	4:38.30	63.48	0.78765	70.03	0.71398	79.8	0.626566	64.99	0.769349	7
2021	JJOO Tokyo	50	F	IM	400	881	Hungria	17	4:37.75	63.77	0.784068	71.49	0.699399	79.32	0.630358	63.17	0.791515	6
2021	JJOO Tokyo	50	F	IM	400	899	Hungria	32	4:35.98	62.17	0.804246	70.21	0.712149	79.72	0.627195	63.88	0.782718	5
2021	JJOO Tokyo	50	F	IM	400	907	España	30	4:35.13	63.1	0.792393	71.75	0.696864	78.42	0.637592	61.86	0.808277	4
2021	JJOO Tokyo	50	F	IM	400	909	USA	27	4:34.90	61.82	0.8088	69.95	0.714796	81.26	0.615309	61.87	0.808146	3
2021	JJOO Tokyo	50	F	IM	400	931	USA	19	4:32.76	62.99	0.793777	69.46	0.719839	78.17	0.639632	62.14	0.804635	2
2021	JJOO Tokyo	50	F	IM	400	938	Japón	25	4:32.08	62.31	0.802439	69.91	0.715205	76.41	0.654365	63.45	0.788022	1
2021	JJOO Tokyo	50	M	IM	200	802	Panamá	19	2:02.70	26.7	1.87266	31.38	1.59337	34.86	1.43431	29.49	1.69549	40
2021	JJOO Tokyo	50	M	IM	200	817	Puerto Rico	20	2:01.92	25.93	1.92827	31.51	1.5868	34.58	1.44592	29.9	1.67224	39
2021	JJOO Tokyo	50	M	IM	200	829	México	24	2:01.34	25.68	1.94704	30.5	1.63934	36	1.38889	29.16	1.71468	38
2021	JJOO Tokyo	50	M	IM	200	842	Taipei	22	2:00.72	25.74	1.9425	31.15	1.60514	35.01	1.42816	28.82	1.73491	37
2021	JJOO Tokyo	50	M	IM	200	844	Ecuador	25	2:00.62	25.68	1.94704	30.53	1.63773	34.85	1.43472	29.56	1.69147	36
2021	JJOO Tokyo	50	M	IM	200	849	Grecia	20	2:00.38	26.7	1.87266	30.13	1.65948	34.61	1.44467	28.94	1.72771	35
2021	JJOO Tokyo	50	M	IM	200	855	Reino Unido	23	2:00.11	25.32	1.97472	29.98	1.66778	35.48	1.40924	29.33	1.70474	34
2021	JJOO Tokyo	50	M	IM	200	859	Lituania	26	1:59.90	25.69	1.94628	30.43	1.64312	36.45	1.37174	27.33	1.82949	33
2021	JJOO Tokyo	50	M	IM	200	866	Austria	27	1:59.56	25.95	1.92678	30.52	1.63827	34.11	1.46585	28.98	1.72533	32
2021	JJOO Tokyo	50	M	IM	200	869	Holanda	26	1:59.44	25.64	1.95008	30.56	1.63613	33.74	1.48192	29.5	1.69492	31
2021	JJOO Tokyo	50	M	IM	200	869	Israel	19	1:59.44	25.14	1.98886	30.19	1.65618	34.95	1.43062	29.16	1.71468	30
2021	JJOO Tokyo	50	M	IM	200	870	Rusia	21	1:59.39	26.01	1.92234	30.66	1.63079	34.19	1.46242	28.53	1.75254	29
2021	JJOO Tokyo	50	M	IM	200	872	Portugal	29	1:59.32	25.27	1.97863	29.78	1.67898	34.95	1.43062	29.32	1.70532	28
2021	JJOO Tokyo	50	M	IM	200	880	China	22	1:58.95	25.74	1.9425	32.68	1.52999	32.56	1.53563	27.97	1.78763	27
2021	JJOO Tokyo	50	M	IM	200	880	Israel	20	1:58.95	25.98	1.92456	30.32	1.64908	33.71	1.48324	28.94	1.72771	26
2021	JJOO Tokyo	50	M	IM	200	880	Brasil	24	1:58.92	24.68	2.02593	30	1.66667	35.02	1.42776	29.22	1.71116	25
2021	JJOO Tokyo	50	M	IM	200	882	Grecia	27	1:58.84	25.46	1.96386	29.6	1.68919	35.13	1.42328	28.65	1.7452	24
2021	JJOO Tokyo	50	M	IM	200	883	Alemania	26	1:58.80	25.71	1.94477	30.96	1.61499	33.82	1.47842	28.31	1.76616	23
2021	JJOO Tokyo	50	M	IM	200	888	Australia	21	1:58.57	25.9	1.9305	29.49	1.69549	35.05	1.42653	28.13	1.77746	22
2021	JJOO Tokyo	50	M	IM	200	888	Portugal	24	1:58.56	25.44	1.96541	29.71	1.68294	33.74	1.48192	29.67	1.6852	21
2021	JJOO Tokyo	50	M	IM	200	891	Hungria	18	1:58.47	24.62	2.03087	29.21	1.71174	35.84	1.39509	28.8	1.73611	20
2021	JJOO Tokyo	50	M	IM	200	893	Brasil	22	1:58.36	25.35	1.97239	30.25	1.65289	33.81	1.47885	28.95	1.72712	19
2021	JJOO Tokyo	50	M	IM	200	894	Francia	19	1:58.30	25.32	1.97472	30.49	1.63988	33.63	1.48677	28.86	1.7325	18
2021	JJOO Tokyo	50	M	IM	200	895	Canadá	20	1:58.29	24.71	2.02347	30.74	1.62655	34.72	1.44009	28.12	1.77809	17
2021	JJOO Tokyo	50	M	IM	200	852	Noruega	21	2:00.21	25.13	1.98965	29.6	1.68919	34.55	1.44718	30.93	1.61655	16
2021	JJOO Tokyo	50	M	IM	200	878	Rusia	26	1:59.05	25.51	1.96002	29.99	1.66722	34.82	1.43596	28.73	1.74034	15
2021	JJOO Tokyo	50	M	IM	200	884	Sudáfrica	18	1:58.75	24.44	2.04583	31.19	1.60308	34.38	1.45433	28.74	1.73974	14
2021	JJOO Tokyo	50	M	IM	200	898	Alemania	30	1:58.13	25.15	1.98807	30.42	1.64366	34.09	1.46671	28.47	1.75623	13
2021	JJOO Tokyo	50	M	IM	200	901	USA	27	1:58.03	25.55	1.95695	29.55	1.69205	33.56	1.48987	29.37	1.70242	12
2021	JJOO Tokyo	50	M	IM	200	902	España	22	1:57.96	25.47	1.96309	29.9	1.67224	34.43	1.45222	28.16	1.77557	11
2021	JJOO Tokyo	50	M	IM	200	906	Australia	28	1:57.80	25.2	1.98413	29.56	1.69147	34.53	1.44802	28.51	1.75377	10
2021	JJOO Tokyo	50	M	IM	200	908	Italia	22	1:57.70	25.34	1.97316	30.92	1.61708	33.22	1.50512	28.22	1.77179	9
2021	JJOO Tokyo	50	M	IM	200	908	Neozelanda	22	1:57.70	25.25	1.9802	29.51	1.69434	34.44	1.4518	28.5	1.75439	8
2021	JJOO Tokyo	50	M	IM	200	909	Hungria	35	1:57.68	24.7	2.02429	29.15	1.71527	35.22	1.41965	28.61	1.74764	7
2021	JJOO Tokyo	50	M	IM	200	913	Japón	26	1:57.49	25.43	1.96618	28.62	1.74703	34.31	1.4573	29.13	1.71644	6
2021	JJOO Tokyo	50	M	IM	200	917	USA	22	1:57.31	24.21	2.06526	30.3	1.65017	32.11	1.55715	30.69	1.6292	5
2021	JJOO Tokyo	50	M	IM	200	943	Japón	27	1:56.22	25.14	1.98886	29.55	1.69205	32.95	1.51745	28.58	1.74948	4
2021	JJOO Tokyo	50	M	IM	200	945	Suiza	26	1:56.17	24.91	2.00723	29.34	1.70416	33.47	1.49388	28.45	1.75747	3
2021	JJOO Tokyo	50	M	IM	200	967	Reino Unido	24	1:55.28	25.06	1.99521	29.46	1.69722	33.3	1.5015	27.46	1.82083	2
2021	JJOO Tokyo	50	M	IM	200	974	China	27	1:55.00	24.78	2.01776	29	1.72414	33.85	1.4771	27.37	1.82682	1
2021	JJOO Tokyo	50	M	IM	400	810	Israel	20	4:21.50	59.04	0.846883	67.28	0.743163	72.3	0.691563	62.88	0.795165	27
2021	JJOO Tokyo	50	M	IM	400	830	Azerbaiyan	27	4:19.40	57.82	0.864753	69.17	0.722857	71.24	0.701853	61.17	0.817394	26
2021	JJOO Tokyo	50	M	IM	400	833	Taipei	22	4:19.06	57.65	0.867303	67.52	0.740521	73.76	0.677874	60.13	0.831532	25
2021	JJOO Tokyo	50	M	IM	400	837	Ecuador	25	4:18.73	58.37	0.856604	66.26	0.754603	72.75	0.687285	61.35	0.814996	24
2021	JJOO Tokyo	50	M	IM	400	841	Eslovaquia	28	4:18.29	57.08	0.875964	68.88	0.7259	73.09	0.684088	59.24	0.844024	23
2021	JJOO Tokyo	50	M	IM	400	849	Puerto Rico	20	4:17.46	57.07	0.876117	67.44	0.7414	71.46	0.699692	61.49	0.81314	22
2021	JJOO Tokyo	50	M	IM	400	851	Reino Unido	22	4:17.27	57.95	0.862813	63.96	0.781739	73.91	0.676498	61.45	0.81367	21
2021	JJOO Tokyo	50	M	IM	400	858	Portugal	20	4:16.52	58.33	0.857192	65	0.769231	73.75	0.677966	59.46	0.840901	20
2021	JJOO Tokyo	50	M	IM	400	861	Italia	23	4:16.31	57.14	0.875044	64.17	0.77918	73.63	0.679071	61.37	0.81473	19
2021	JJOO Tokyo	50	M	IM	400	862	Rusia	21	4:16.21	57.58	0.868357	65.74	0.760572	72.43	0.690322	60.46	0.826993	18
2021	JJOO Tokyo	50	M	IM	400	865	Holanda	26	4:15.83	56.91	0.87858	67.07	0.74549	70.62	0.708015	61.23	0.816593	17
2021	JJOO Tokyo	50	M	IM	400	866	Australia	20	4:15.76	56.37	0.886997	63.63	0.785793	74.29	0.673038	61.47	0.813405	16
2021	JJOO Tokyo	50	M	IM	400	898	España	24	4:12.67	57.07	0.876117	64.67	0.773156	70.74	0.706814	60.19	0.830703	15
2021	JJOO Tokyo	50	M	IM	400	900	Grecia	20	4:12.50	58.02	0.861772	64.6	0.773994	70.02	0.714082	59.86	0.835282	14
2021	JJOO Tokyo	50	M	IM	400	901	Hungria	29	4:12.38	57.35	0.87184	63.67	0.785299	73.12	0.683807	58.24	0.858516	13
2021	JJOO Tokyo	50	M	IM	400	904	Alemania	26	4:12.09	56.6	0.883392	66.36	0.753466	69.95	0.714796	59.18	0.84488	12
2021	JJOO Tokyo	50	M	IM	400	905	Japón	20	4:12.08	57.09	0.87581	64.74	0.77232	71.37	0.700574	58.88	0.849185	11
2021	JJOO Tokyo	50	M	IM	400	920	China	27	4:10.63	55.7	0.897666	63.41	0.788519	73.64	0.678979	57.88	0.863856	10
2021	JJOO Tokyo	50	M	IM	400	922	Japón	27	4:10.52	55.07	0.907935	63.45	0.788022	71.28	0.701459	60.72	0.823452	9
2021	JJOO Tokyo	50	M	IM	400	913	Italia	22	4:11.32	56.33	0.887626	67.02	0.746046	70.44	0.709824	57.53	0.869112	8
2021	JJOO Tokyo	50	M	IM	400	914	Neozelanda	22	4:11.22	56.86	0.879353	63.13	0.792016	71.95	0.694927	59.28	0.843455	7
2021	JJOO Tokyo	50	M	IM	400	915	Francia	19	4:11.16	56.14	0.890631	66.67	0.749963	69.45	0.719942	58.9	0.848896	6
2021	JJOO Tokyo	50	M	IM	400	921	Reino Unido	26	4:10.59	57.44	0.870474	64.05	0.78064	71.77	0.69667	57.33	0.872144	5
2021	JJOO Tokyo	50	M	IM	400	921	Hungria	32	4:10.59	57.6	0.868056	63.82	0.783453	70.72	0.707014	58.45	0.855432	4
2021	JJOO Tokyo	50	M	IM	400	923	Australia	21	4:10.38	57.12	0.87535	63.46	0.393949	73.48	0.680457	56.32	0.887784	3
2021	JJOO Tokyo	50	M	IM	400	924	USA	25	4:10.28	56.65	0.882613	64.36	0.38844	72.55	0.68918	56.72	0.881523	2
2021	JJOO Tokyo	50	M	IM	400	934	USA	27	4:09.42	56.23	0.889205	64.1	0.390016	69.14	0.72317	59.95	0.834028	1
2021	Cpto M Abu Dhabi	25	F	IM	200	820	República Checa	24	2:10.16	28.2	1.77305	33.92	1.47406	36.83	1.35759	31.21	1.60205	16
2021	Cpto M Abu Dhabi	25	F	IM	200	828	Austria	24	2:09.76	28.24	1.77054	33.06	1.5124	37.29	1.34084	31.17	1.60411	15
2021	Cpto M Abu Dhabi	25	F	IM	200	829	Puerto Rico	22	2:09.72	27.97	1.78763	32.27	1.54943	38.39	1.30242	31.09	1.60823	14
2021	Cpto M Abu Dhabi	25	F	IM	200	836	Rusia	27	2:09.35	28.14	1.77683	32.84	1.52253	36.35	1.37552	32.02	1.56152	13
2021	Cpto M Abu Dhabi	25	F	IM	200	840	Hungria	32	2:09.15	28.08	1.78063	32.41	1.54273	37.58	1.33049	31.08	1.60875	12
2021	Cpto M Abu Dhabi	25	F	IM	200	842	Reino Unido	17	2:09.02	28.21	1.77242	32.55	1.5361	37.54	1.33191	30.72	1.6276	11
2021	Cpto M Abu Dhabi	25	F	IM	200	848	Holanda	21	2:08.74	27.9	1.79211	34.53	1.44802	36.62	1.36537	29.69	1.68407	10
2021	Cpto M Abu Dhabi	25	F	IM	200	849	Irlanda	20	2:08.69	27.96	1.78827	33.12	1.50966	37.32	1.33976	30.29	1.65071	9
2021	Cpto M Abu Dhabi	25	F	IM	200	824	Corea del Sur	27	2:09.94	27.44	1.82216	32.03	1.56104	38.35	1.30378	32.12	1.55666	8
2021	Cpto M Abu Dhabi	25	F	IM	200	878	Suiza	32	2:07.26	27.59	1.81225	31.95	1.56495	37.19	1.34445	30.53	1.63773	7
2021	Cpto M Abu Dhabi	25	F	IM	200	885	Italia	22	2:06.92	27.59	1.81225	32.99	1.51561	35.59	1.40489	30.75	1.62602	6
2021	Cpto M Abu Dhabi	25	F	IM	200	901	Canadá	24	2:06.13	27.87	1.79404	32.66	1.53092	35.42	1.41163	30.18	1.65673	5
2021	Cpto M Abu Dhabi	25	F	IM	200	904	USA	29	2:06.02	27.95	1.78891	31.77	1.57381	36.38	1.37438	29.92	1.67112	4
2021	Cpto M Abu Dhabi	25	F	IM	200	933	USA	20	2:04.68	26.44	1.89107	31.96	1.56446	36.36	1.37514	29.92	1.67112	3
2021	Cpto M Abu Dhabi	25	F	IM	200	938	China	16	2:04.48	26.85	1.8622	31.68	1.57828	36.09	1.38543	29.86	1.67448	2
2021	Cpto M Abu Dhabi	25	F	IM	200	942	Canadá	24	2:04.29	27.33	1.82949	31.54	1.58529	35.53	1.40726	29.89	1.6728	1
2021	Cpto M Abu Dhabi	25	F	IM	400	803	Rusia	17	4:38.49	64.07	0.780396	69.26	0.721917	79.23	0.631074	65.93	0.75838	16
2021	Cpto M Abu Dhabi	25	F	IM	400	810	Suiza	32	4:37.75	61.94	0.807233	70.71	0.707114	78.4	0.637755	66.7	0.749625	15
2021	Cpto M Abu Dhabi	25	F	IM	400	823	Brasil	25	4:36.22	63.61	0.78604	68.37	0.731315	80.2	0.623441	64.04	0.780762	14
2021	Cpto M Abu Dhabi	25	F	IM	400	828	España	26	4:35.74	62.2	0.803859	69.38	0.720669	79.11	0.632031	65.05	0.76864	13
2021	Cpto M Abu Dhabi	25	F	IM	400	828	Hungria	18	4:35.69	64.01	0.781128	70.86	0.705617	77.94	0.641519	62.88	0.795165	12
2021	Cpto M Abu Dhabi	25	F	IM	400	840	Turquia	23	4:34.42	62.14	0.804635	71.21	0.702149	75.72	0.660328	65.35	0.765111	11
2021	Cpto M Abu Dhabi	25	F	IM	400	850	Serbia	21	4:33.30	62.62	0.798467	68.52	0.729714	77.88	0.642013	64.28	0.777847	10
2021	Cpto M Abu Dhabi	25	F	IM	400	850	China	16	4:33.29	60.44	0.827267	70.32	0.711035	79.03	0.632671	63.5	0.787402	9
2021	Cpto M Abu Dhabi	25	F	IM	400	856	Reino Unido	17	4:32.68	62.74	0.79694	68.41	0.730887	77.75	0.643087	63.78	0.783945	8
2021	Cpto M Abu Dhabi	25	F	IM	400	867	Hungria	32	4:31.49	62.04	0.805932	68.84	0.726322	78.15	0.639795	62.46	0.800512	7
2021	Cpto M Abu Dhabi	25	F	IM	400	888	Italia	22	4:29.37	62.37	0.801667	69.84	0.715922	75.28	0.664187	61.88	0.808016	6
2021	Cpto M Abu Dhabi	25	F	IM	400	892	Canadá	24	4:28.97	62.9	0.794913	68.9	0.725689	75.38	0.663306	61.79	0.809192	5
2021	Cpto M Abu Dhabi	25	F	IM	400	907	USA	19	4:27.45	62.01	0.806322	67.39	0.74195	76.85	0.650618	61.2	0.816993	4
2021	Cpto M Abu Dhabi	25	F	IM	400	915	USA	29	4:26.63	62.13	0.804764	69.41	0.720357	74.95	0.667111	60.14	0.831393	3
2021	Cpto M Abu Dhabi	25	F	IM	400	917	Irlanda	20	4:26.52	62.28	0.802826	68.98	0.724848	70.7	0.707214	68.4	0.730994	2
2021	Cpto M Abu Dhabi	25	F	IM	400	927	Canadá	23	4:25.55	62.2	0.803859	68.48	0.73014	73.76	0.677874	61.11	0.818197	1
2021	Cpto M Abu Dhabi	25	M	IM	200	809	Libano	19	1:57.64	25.55	1.95695	29.53	1.69319	34.16	1.4637	28.4	1.76056	23
2021	Cpto M Abu Dhabi	25	M	IM	200	809	Ucrania	18	1:57.61	25.19	1.98491	29.25	1.7094	34.66	1.44259	28.51	1.75377	22
2021	Cpto M Abu Dhabi	25	M	IM	200	819	Irlanda	21	1:57.13	24.74	2.02102	29.62	1.68805	34.97	1.4298	27.8	1.79856	21
2021	Cpto M Abu Dhabi	25	M	IM	200	821	Hungria	19	1:57.07	25.54	1.95771	30.56	1.63613	33.74	1.48192	27.23	1.83621	20
2021	Cpto M Abu Dhabi	25	M	IM	200	822	España	22	1:57.00	25.26	1.97941	29.89	1.6728	33.56	1.48987	28.29	1.76741	19
2021	Cpto M Abu Dhabi	25	M	IM	200	830	Bélgica	27	1:56.64	25.17	1.98649	29.26	1.70882	34.55	1.44718	27.66	1.80766	18
2021	Cpto M Abu Dhabi	25	M	IM	200	838	Bulgaria	21	1:56.28	25.58	1.95465	30.27	1.6518	32.78	1.52532	27.65	1.80832	17
2021	Cpto M Abu Dhabi	25	M	IM	200	845	Francia	20	1:55.93	24.9	2.00803	28.89	1.7307	33.9	1.47493	28.24	1.77054	16
2021	Cpto M Abu Dhabi	25	M	IM	200	846	Turquia	18	1:55.87	25.75	1.94175	28.97	1.72592	33.42	1.49611	27.73	1.8031	15
2021	Cpto M Abu Dhabi	25	M	IM	200	849	Egipto	24	1:55.74	25.21	1.98334	28.76	1.73853	34.03	1.46929	27.74	1.80245	14
2021	Cpto M Abu Dhabi	25	M	IM	200	865	Rusia	27	1:55.02	24.95	2.00401	29.03	1.72236	32.66	1.53092	28.38	1.7618	13
2021	Cpto M Abu Dhabi	25	M	IM	200	870	Reino Unido	26	1:54.81	24.94	2.00481	29.18	1.7135	33.45	1.49477	27.24	1.83554	12
2021	Cpto M Abu Dhabi	25	M	IM	200	874	Brasil	26	1:54.63	24.48	2.04248	28.35	1.76367	33.75	1.48148	28.05	1.78253	11
2021	Cpto M Abu Dhabi	25	M	IM	200	876	Brasil	22	1:54.57	24.67	2.02675	28.42	1.75932	32.47	1.53988	29.01	1.72354	10
2021	Cpto M Abu Dhabi	25	M	IM	200	884	Canadá	20	1:54.22	24.44	2.04583	28.99	1.72473	33.34	1.4997	27.45	1.82149	9
2021	Cpto M Abu Dhabi	25	M	IM	200	875	Israel	29	1:54.61	25.04	1.99681	28.75	1.73913	32.94	1.51791	27.88	1.7934	8
2021	Cpto M Abu Dhabi	25	M	IM	200	887	Reino Unido	24	1:54.08	24.56	2.03583	28.39	1.76118	33.27	1.50286	27.86	1.79469	7
2021	Cpto M Abu Dhabi	25	M	IM	200	894	USA	21	1:53.76	24.62	2.03087	28.44	1.75809	33.54	1.49076	27.16	1.84094	6
2021	Cpto M Abu Dhabi	25	M	IM	200	903	China	27	1:53.41	24.34	2.05423	28.55	1.75131	33.31	1.50105	27.21	1.83756	5
2021	Cpto M Abu Dhabi	25	M	IM	200	939	Grecia	27	1:51.94	24.96	2.00321	27.35	1.82815	32.28	1.54895	27.35	1.82815	4
2021	Cpto M Abu Dhabi	25	M	IM	200	949	Italia	22	1:51.54	24.29	2.05846	28.44	1.75809	31.86	1.56937	26.95	1.85529	3
2021	Cpto M Abu Dhabi	25	M	IM	200	954	USA	20	1:51.35	24.36	2.05255	27.71	1.8044	32.37	1.54464	26.91	1.85805	2
2021	Cpto M Abu Dhabi	25	M	IM	200	959	Japón	27	1:51.15	24.04	2.07987	27.39	1.82548	31.93	1.56593	27.79	1.79921	1
2021	Cpto M Abu Dhabi	25	M	IM	400	811	Rusia	27	4:11.74	57.4	0.87108	64.9	0.770416	69.97	0.714592	59.47	0.84076	11
2021	Cpto M Abu Dhabi	25	M	IM	400	820	México	24	4:10.83	56.88	0.879044	64.6	0.773994	71.24	0.701853	58.11	0.860437	10
2021	Cpto M Abu Dhabi	25	M	IM	400	833	Grecia	27	4:09.53	56.23	0.889205	62.62	0.798467	70.1	0.713267	60.58	0.825355	9
2021	Cpto M Abu Dhabi	25	M	IM	400	816	Hungria	22	4:11.26	55.25	0.904977	64.09	0.780153	73	0.684932	58.92	0.848608	8
2021	Cpto M Abu Dhabi	25	M	IM	400	840	Brasil	24	4:08.77	57.47	0.870019	63.18	0.79139	70.75	0.706714	57.37	0.871536	7
2021	Cpto M Abu Dhabi	25	M	IM	400	845	Israel	18	4:08.31	57.93	0.863111	64	0.78125	70.35	0.710732	56.03	0.892379	6
2021	Cpto M Abu Dhabi	25	M	IM	400	899	USA	21	4:03.29	55.66	0.898311	61.22	0.816727	69.93	0.715001	56.48	0.885269	5
2021	Cpto M Abu Dhabi	25	M	IM	400	941	Italia	22	3:59.57	54.54	0.916758	62.03	0.806062	67.63	0.739317	56.37	0.886997	4
2021	Cpto M Abu Dhabi	25	M	IM	400	960	USA	20	3:57.99	54.33	0.920302	59.39	0.841893	68.03	0.73497	56.24	0.889047	3
2021	Cpto M Abu Dhabi	25	M	IM	400	979	Rusia	18	3:56.47	54.49	0.9176	60.42	0.827541	66.75	0.749064	54.83	0.91191	2
2021	Cpto M Abu Dhabi	25	M	IM	400	981	Japón	27	3:56.26	53.29	0.938262	58.71	0.851644	67.05	0.745712	57.21	0.873973	1
